# Supplementary material for: The effect of cigarette smoking habits on the outcome of dental implant treatment
Source: PeerJ. 2014 Sep 2;2:e546. doi: 10.7717/peerj.546 (PMC4157230; doi:10.7717/peerj.546)
Supplement: Supplemental Information 1 [file peerj-02-546-s001.xlsx]

## Sheet: גיליון1
אזור שיניים	תאריך בדיקה	תאריך השתלת עצם	תאריך השתלה	תאריך חשיפה מיועד	תאריך חשיפה	חברת 3.I	חברת Cal	חברת M.I.S	קוטר* אורך	מספר שתלים	Int/Ext	מבצע החשיפה	אישור חריג	פריו'	כירו'	פרות'	ת.כשלון משנה אחרת	ת.כישלון בשנה זו	שלב הכישלון	מס' אצוה	מס' שתלים שנכשלו
33	-		5.1.04	מאי04			+		15*3.75 13*3.75 11.5*3.75	3					+
35	-		5.1.04	מאי04			+		15*3.75 13*3.75 11.5*3.75	3					+
34	-		5.1.04	מאי04			+		15*3.75 13*3.75 11.5*3.75	3					+
11	-		5.1.04	יולי04	10.5.04			+	16*4.20 16*4.20	1	I	ד"ר שושני			+
21	-		5.1.04	יולי04	10.5.04			+	16*4.20 16*4.20	1	I	ד"ר שושני			+
41	4.12.03	5.1.04	5.1.04	אוקטובר04	6.9.04			+	16*3.75	1	I	ד"ר חלד			+
14	2.11.03		5.1.04	יולי04	28.6.04			+	16*4.20	1	I	ד"ר חלד			+
32	3.8.03		5.1.04	מאי04	5.7.04			+	13*3.30 13*3.30	1	I	ד"ר ברואנשטיין			+
42	3.8.03		5.1.04	מאי04	5.7.04			+	13*3.30 13*3.30	1	I	ד"ר ברואנשטיין			+
24	-	5.1.04	5.1.04	אוקטובר04	5.7.04			+	16*3.30 16*3.75 16*3.75	3	I	ד"ר שושני			+
23	-	5.1.04	5.1.04	אוקטובר04	5.7.04			+	16*3.30 16*3.75 16*3.75	3	I	ד"ר שושני			+
22	-	5.1.04	5.1.04	אוקטובר04	5.7.04			+	16*3.30 16*3.75 16*3.75	3	I	ד"ר שושני			+
35	7.9.03		5.1.04	מאי04	21.6.04			+	11.5*3.75 11.5*3.75 13*3.75	3	I	ד"ר ברואנשטיין			+
36	7.9.03		5.1.04	מאי04	21.6.04			+	11.5*3.75 11.5*3.75 13*3.75	3	I	ד"ר ברואנשטיין			+
37	7.9.03		5.1.04	מאי04	21.6.04			+	11.5*3.75 11.5*3.75 13*3.75	3	I	ד"ר ברואנשטיין			+
44	30.11.03		5.1.04	מאי04	7.6.04			+	13*3.75	1	I	ד"ר שושני			+
21	28.12.03	5.1.04		אוקטובר04											+
37	-		5.1.04	מאי04	3.5.04			+	10*3.75 10*3.75	2	I	ד"ר ברואנשטיין			+
36	-		5.1.04	מאי04	3.5.04			+	10*3.75 10*3.75	2	I	ד"ר ברואנשטיין			+
28	29.6.03		5.1.04	יולי04	26.7.04			+	11.5*3.75 13*3.75	2	I	ד"ר ברואנשטיין			+
18	29.6.03		5.1.04	יולי04	26.7.04			+	11.5*3.75 13*3.75	2	I	ד"ר ברואנשטיין			+
24	4.5.03		5.1.04	יולי04	7.6.04			+	13*3.75 13*3.75 13*3.75 11.5*3.75	4	I	ד"ר יהלום			+
25	4.5.03		5.1.04	יולי04	7.6.04			+	13*3.75 13*3.75 13*3.75 11.5*3.75	4	I	ד"ר יהלום			+
26	4.5.03		5.1.04	יולי04	7.6.04			+	13*3.75 13*3.75 13*3.75 11.5*3.75	4	I	ד"ר יהלום			+
27	4.5.03		5.1.04	יולי04	7.6.04			+	13*3.75 13*3.75 13*3.75 11.5*3.75	4	I	ד"ר יהלום			+
36	-		5.1.04	מאי04	30.8.04			+	13*3.75	1	I	ד"ר גבעול			+
47	25.8.03		5.1.04	מאי04	7.6.04			+	11.5*3.75 13*3.75	2	I	ד"ר שושני			+
46	25.8.03		5.1.04	מאי04	7.6.04			+	11.5*3.75 13*3.75	2	I	ד"ר שושני			+
42	17.8.03		5.1.04					+	13*4.20	1	I	ד"ר שרן			+			8.6.04	לפני החשיפה	30990	1
41	17.8.03		5.1.04	מאי04	9.2.04			+	13*3.75	1	I	ד"ר שרן			+
35	29.6.03		6.1.04	מאי04	18.5.04			+	13*3.75	1	I	ד"ר קרני		+				26.7.04	לאחר החשיפה (בזמן שיקום)	31185	1
45	14.9.03		6.1.04	מאי04	23.6.04			+	13*3.30	1	I	ד"ר קרני		+		7.6.04		2.9.04	לאחר השיקום	30999	1
14	7.12.03		6.1.04	יולי04	5.7.04			+	13*3.75	1	I	ד"ר ברואנשטיין		+
46	28.8.03		6.1.04	מאי04	30.6.04			+		1	I	ד'"ר קרני		+		26.7.04
14	-		7.1.04	יולי04	12.5.04			+	13*4.20	1	I	ד"ר קרני		+		8.6.04
46	31.8.03		12.1.04	מאי04	12.7.04			+	13*3.75 13*3.75 10*3.75	3	I	ד"ר חלד			+	21.7.04
47	31.8.03		12.1.04	מאי04	12.7.04			+	13*3.75 13*3.75 10*3.75	3	I	ד"ר חלד			+	21.7.04
48	31.8.03		12.1.04	מאי04	12.7.04			+	13*3.75 13*3.75 10*3.75	3	I	ד"ר חלד			+	21.7.04
32	31.8.03		12.1.04	מאי04	24.5.04			+	16*3.30 16*3.30	2	I	ד"ר ברואנשטיין			+
42	31.8.03		12.1.04	מאי04	24.5.04			+	16*3.30 16*3.30	2	I	ד"ר ברואנשטיין			+
45	19.12.03	12.1.04		אוקטובר04											+
44	19.12.03	12.1.04		אוקטובר04											+
35	-	12.1.04	12.1.04	אוקטובר04			+		13*3.75 15*3.75 15*3.75	3					+
31	-	12.1.04	12.1.04	אוקטובר04			+		13*3.75 15*3.75 15*3.75	3					+
33	-	12.1.04	12.1.04	אוקטובר04			+		13*3.75 15*3.75 15*3.75	3					+
42	-	12.1.04	12.1.04	אוקטובר04			+		13*3.75 13*3.75	2					+
41	-	12.1.04	12.1.04	אוקטובר04			+		13*3.75 13*3.75	2					+
14	7.9.03		12.1.04	2004-07-01				+	13*3.75	1	I				+
15	26.10.03		12.1.04	יולי04	5.7.04			+	13*3.75	1	I	ד"ר ברואנשטיין			+
34	7.8.03		12.1.04	מאי+יולי04	11.5.04			+	16*3.75 16*3.75	2	I	ד"ר שדה			+
25	7.8.03		12.1.04	מאי+יולי04	11.5.04			+	16*3.75 16*3.75	2	I	ד"ר שדה			+
45	19.12.03	12.1.04		אוקטובר04											+
44	19.12.03	12.1.04		אוקטובר04											+
37	8.1.04	12.1.04	12.1.04	אוקטובר04	21.6.04		+		11*3.75 10*3.75 13*3.75			ד"ר רחימא			+
36	8.1.04	12.1.04	12.1.04	אוקטובר04	21.6.04		+		11*3.75 10*3.75 13*3.75			ד"ר רחימא			+
25	30.11.03	19.1.04		אוקטובר04											+
24	30.11.03	19.1.04		אוקטובר04											+
35	30.11.03		19.1.04	מאי04	11.5.04			+	13*3.75	1	I	ד"ר שדה			+
26	30.11.03		19.1.04	יולי04	5.10.04			+	13*3.30 11*3.30	2	I	ד"ר ניצן			+
25	-		19.1.04	מאי+יולי04	21.6.04			+	10*3.75 11*3.75 13*3.75	3	I	ד"ר ברואנשטיין			+
26	-		19.1.04	מאי+יולי04	21.6.04			+	10*3.75 11*3.75 13*3.75	3	I	ד"ר ברואנשטיין			+
35	-		19.1.04	מאי+יולי04	21.6.04			+	10*3.75 11*3.75 13*3.75	3	I	ד"ר ברואנשטיין			+
21	4.5.03	19.1.04	19.1.04	אוקטובר04	22.11.04			+	16*3.75	1	I	ד"ר דבורי			+
14	4.5.03	19.1.04		אוקטובר04											+
15	9.11.03		19.1.04	יולי04	14.6.04			+	16*4.20	1	I	ד"ר חלד			+
21	26.10.03	19.1.04		אוקטובר04											+
24	7.12.03		19.1.04	יולי04	26.7.04			+	13*3.75	1	I	ד"ר ניצן			+
36	9.11.03		19.1.04	מאי04				+	13*4.20	1	I	ד"ר גבעול			+			17.5.04	בזמן החשיפה	309990	1
15	31.8.03		19.1.04	יולי04				+	13*3.75 16*4.20	2	I				+
14	31.8.03		19.1.04	יולי04				+	13*3.75 16*4.20	2	I				+
48			19.1.04	מאי04	5.12.04		+		11.5*3.75 13*3.75	2		ד"ר שדה			+
47			19.1.04	מאי04	5.12.04		+		11.5*3.75 13*3.75	2		ד"ר שדה			+
27	-	14.1.04	14.1.04	אוקטובר04			+		13*3.75 13*3.75 13*3.75 13*3.75	4					+
24	-	14.1.04	14.1.04	אוקטובר04			+		13*3.75 13*3.75 13*3.75 13*3.75	4					+
26	-	14.1.04	14.1.04	אוקטובר04			+		13*3.75 13*3.75 13*3.75 13*3.75	4					+
25	-	14.1.04	14.1.04	אוקטובר04			+		13*3.75 13*3.75 13*3.75 13*3.75	4					+
17	-	14.1.04	14.1.04	אוקטובר04			+		13*3.75 13*3.75 13*3.75	3					+
16	-	14.1.04	14.1.04	אוקטובר04			+		13*3.75 13*3.75 13*3.75	3					+
15	14.9.03		21.1.04	יולי04	19.10.04			+	13*3.75	1	I	ד"ר קרני		+
34	26.10.03		26.1.04	מאי04	15.11.04			+	13*3.75 13*3.75 11*3.75	3	I	ד"ר בראונשטיין			+
36	26.10.03		26.1.04	מאי04	15.11.04			+	13*3.75 13*3.75 11*3.75	3	I	ד"ר בראונשטיין			+
37	26.10.03		26.1.04	מאי04	15.11.04			+	13*3.75 13*3.75 11*3.75	3	I	ד"ר בראונשטיין			+
21	21.12.03		26.1.04	יולי04	9.8.04			+	11*3.75 13*3.75 13*4.20 13*3.30	3	I	ד'"ר בראונשטיין			+			9.8.04	בזמן החשיפה	31298 30990 30410	3
24	21.12.03		26.1.04	יולי04	9.8.04			+	11*3.75 13*3.75 13*4.20 13*3.30	3	I	ד'"ר בראונשטיין			+			9.8.04	בזמן החשיפה	31298 30990 30410	3
25	21.12.03		26.1.04	יולי04	9.8.04			+	11*3.75 13*3.75 13*4.20 13*3.30	3	I	ד'"ר בראונשטיין			+
26	21.12.03		26.1.04	יולי04	9.8.04			+	11*3.75 13*3.75 13*4.20 13*3.30	3	I	ד'"ר בראונשטיין			+			9.8.04	בזמן החשיפה	31298 30990 30410	3
15	9.11.03		26.1.04	יולי04	1.3.04			+	13*4.20	1	I	ד"ר שוחט			+			1.3.04	בזמן החשיפה	30845	1
47	31.8.03		26.1.04	מאי04	13.7.04			+	10*3.75 10*4.20	2	I	ד"ר בראונשטיין			+
46	31.8.03		26.1.04	מאי04	13.7.04			+	10*3.75 10*4.20	2	I	ד"ר בראונשטיין			+
15	26.10.03		26.1.04	יולי04	12.7.04			+	13*4.20	1	I	ד"ר בראונשטיין			+
31	30.11.03		26.1.04	מאי04	3.1.05			+	16*3.30	1	I	ד"ר יהלום			+
36	6.7.03		26.1.04	מאי04	5.7.04			+	11*3.75 13*3.75	2	I	ד"ר גבעול			+
37	6.7.03		26.1.04	מאי04	5.7.04			+	11*3.75 13*3.75	2	I	ד"ר גבעול			+
13	14.9.03		26.1.04	יולי04	5.7.04			+	13*4.20 13*3.75	2	I	ד"ר ברואנשטיין			+
23	14.9.03		26.1.04	יולי04	5.7.04			+	13*4.20 13*3.75	2	I	ד"ר ברואנשטיין			+
11	-	26.1.04		אוקטובר04											+
12	-	26.1.04		אוקטובר04											+
13	-	26.1.04		אוקטובר04											+
14	-	26.1.04		אוקטובר04											+
24	14.9.03		2.2.04	יולי04	13.7.04			+	16*3.75	1	I	ד"ר ברואנשטיין			+
15	7.12.03		2.2.04	יולי04	26.7.04			+	13*3.75	1	I	ד"ר שושני			+
11	7.12.03		2.2.04	יולי04	11.10.04			+	13*3.75	1	I	ד"ר ניצן			+
11	16.11.03		2.2.04	יולי04	26.7.04		+		13*3.25 15*3.25 15*3.75 15*3.75	4		ד"ר שושני			+
12	16.11.03		2.2.04	יולי04	26.7.04		+		13*3.25 15*3.25 15*3.75 15*3.75	4		ד"ר שושני			+
21	16.11.03		2.2.04	יולי04	26.7.04		+		13*3.25 15*3.25 15*3.75 15*3.75	4		ד"ר שושני			+
22	16.11.03		2.2.04	יולי04	26.7.04		+		13*3.25 15*3.25 15*3.75 15*3.75	4		ד"ר שושני			+
14	29.9.03	2.2.04		אוקטובר04											+
15	29.9.03	2.2.04		אוקטובר04											+
16	29.9.03	2.2.04		אוקטובר04											+
14	12.10.03		2.2.04	יולי04	19.7.04			+	13*3.75 16*3.30 13*3.30	3	I	ד"ר ברואנשטיין			+
24	12.10.03		2.2.04	יולי04	19.7.04			+	13*3.75 16*3.30 13*3.30	3	I	ד"ר ברואנשטיין			+
25	12.10.03		2.2.04	יולי04	19.7.04			+	13*3.75 16*3.30 13*3.30	3	I	ד"ר ברואנשטיין			+
35	14.9.03		2.2.04	מאי04				+	13*3.75 13*3.75 11.5*3.75	3	I	ד"ר חלד			+			17.5.04	בזמן החשיפה	30373	1
36	14.9.03		2.2.04	מאי04				+	13*3.75 13*3.75 11.5*3.75	3	I	ד"ר חלד			+
13	-	2.2.04	2.2.04	אוקטובר04			+		15*5.0	1		ד"ר דביר			+
12	7.12.03		9.2.04	יולי04	6.9.04			+	16*3.75	1	I	ד"ר ניצן			+
35	2.3.03		9.2.03	מאי04	5.7.04		+		13*3.75 11*3.75 11*3.75	3		ד"ר יהלום			+
36	2.3.03		9.2.03	מאי04	5.7.04		+		13*3.75 11*3.75 11*3.75	3		ד"ר יהלום			+
37	2.3.03		9.2.03	מאי04	5.7.04		+		13*3.75 11*3.75 11*3.75	3		ד"ר יהלום			+
32	12.10.03		9.2.04	מאי04	14.6.04			+	13*330	1	I	ד"ר יהלום			+
16	-	9.2.04	9.2.04	אוקטובר04			+		10*3.75	1					+
34	12.10.03		9.2.04	מאי04	7.6.04			+	13*3.75 13*3.75 11*3.75	3	I	ד"ר בראונשטיין			+
35	12.10.03		9.2.04	מאי04	7.6.04			+	13*3.75 13*3.75 11*3.75	3	I	ד"ר בראונשטיין			+
36	12.10.03		9.2.04	מאי04	7.6.04			+	13*3.75 13*3.75 11*3.75	3	I	ד"ר בראונשטיין			+			31.8.04	לאחר החשיפה (בזמן שיקום)	30373	1
24	12.10.03		9.2.04	יולי04				+	13*3.75	1	I	ד"ר שושני			+			9.2.04	בזמן החשיפה	309999	1
24	12.10.03		9.2.04	יולי04	18.10.04			+	16*4.20	1	I				+
11	12.10.03	9.2.04		אוקטובר04											+
12	12.10.03	9.2.04		אוקטובר04											+
21	12.10.03	9.2.04		אוקטובר04											+
22	12.10.03	9.2.04		אוקטובר04											+
14	-		9.2.04	יולי04	21.6.04			+	16*3.75	1	I	ד"ר שושני			+
42	19.12.03		9.2.04	מאי04	10.5.04			+	13*3.30 13*3.30	2	I	ד"ר שדה			+
31	19.12.03		9.2.04	מאי04	10.5.04			+	13*3.30 13*3.30	2	I	ד"ר שדה			+
35	16.11.03		9.2.04	מאי04				+	11*3.75 13*3.75 13*3.75	3	I				+
36	16.11.03		9.2.04	מאי04				+	11*3.75 13*3.75 13*3.75	3	I				+			7.3.04	לפני החשיפה	30373 31298	1
37	16.11.03		9.2.04	מאי04				+	11*3.75 13*3.75 13*3.75	3	I				+			7.3.04	לפני החשיפה	30373 31298	1
12	26.10.03	9.2.04	9.2.04	אוקטובר04				+	16*3.30	1	I				+
37	2.11.03		9.2.04	מאי04				+	13*3.75	1	I				+			29.3.04	לפני החשיפה	31185	1
15	1.9.03		9.2.04	יולי04				+	13*4.20	1	I				+
47	30.11.03		28.1.04	מאי04				+	13*3.75 13*3.75	2	I			+				8.8.04	לפני החשיפה	31298	1
46	30.11.03		28.1.04	מאי04				+	13*3.75 13*3.75	2	I			+
24	8.11.03		4.2.04	יולי04				+	13*3.75	1	I			+
14	28.11.03		11.2.04	יולי04	27.7.04			+	13*3.30 13*3.75	2	I	ד"ר קרני		+
24	28.11.03		11.2.04	יולי04	27.7.04			+	13*3.30 13*3.75	2	I	ד"ר קרני		+
34	19.10.03		16.2.04	יוני04	3.5.04			+	13*3.75 13*3.75 10*3.30 13*3.30	4	I	ד"ר שושני			+
35	19.10.03		16.2.04	יוני04	3.5.04			+	13*3.75 13*3.75 10*3.30 13*3.30	4	I	ד"ר שושני			+
36	19.10.03		16.2.04	יוני04	3.5.04			+	13*3.75 13*3.75 10*3.30 13*3.30	4	I	ד"ר שושני			+
37	19.10.03		16.2.04	יוני04	3.5.04			+	13*3.75 13*3.75 10*3.30 13*3.30	4	I	ד"ר שושני			+
34	19.10.03		16.02.04	יוני04				+	13*3.75	1	I				+
45	20.7.03		16.2.04	יוני04	10.8.04		+		11.5*3.75 11.5*3.75 13*3.75	3		ד"ר זאקוטו			+
46	20.7.03		16.2.04	יוני04	10.8.04		+		11.5*3.75 11.5*3.75 13*3.75	3		ד"ר זאקוטו			+
47	20.7.03		16.2.04	יוני04	10.8.04		+		11.5*3.75 11.5*3.75 13*3.75	3		ד"ר זאקוטו			+
32	19.10.03		16.2.04	אוגוסט04				+	16*3.30 16*3.30	2	I				+
41	19.10.03		16.2.04	אוגוסט04				+	16*3.30 16*3.30	2	I				+
37	19.10.03		16.2.04	יוני04	7.6.04			+	11*3.75 13*3.75 13*3.75	3	I	ד"ר בראונשטיין			+
36	19.10.03		16.2.04	יוני04	7.6.04			+	11*3.75 13*3.75 13*3.75	3	I	ד"ר בראונשטיין			+
44	25.1.03		16.2.04	יוני04				+	13*3.75	1	I				+
44	28.12.04		16.2.04	יוני04	13.7.04			+	13*3.30	1	I	ד"ר בראונשטיין			+
13	16.1.03		16.2.04	אוגוסט04	16.8.04			+	13*3.75	1	I	ד"ר חלד			+
24	14.12.03		16.2.04	אוגוסט04	26.7.04			+	13*3.75 13*3.75	2	I	ד"ר ניצן			+
25	14.12.03		16.2.04	אוגוסט04	26.7.04			+	13*3.75 13*3.75	2	I	ד"ר ניצן			+
14	-		16.2.04	אוגוסט04	30.8.04			+	13*3.75	1	I	ד"ר גבעול			+
24	19.10.03	16.2.04	16.2.04	נובמבר04	16.8.04			+	13*3.75	1	I	ד"ר שושני			+
26	27.7.03		16.2.04	יוני04				+	11*4.20	1	I				+
32	27.7.03		16.2.04	יוני04	12.7.04			+	13*3.75 16*3.75	2	I	ד"ר חלד			+
34	27.7.03		16.2.04	יוני04	12.7.04			+	13*3.75 16*3.75	2	I	ד"ר חלד			+
14	14.12.03		23.2.04	יוני04+אוגוסט04	20.12.04			+	16*3.75 13*3.75	2	I	ד"ר בראונשטיין			+
45	14.12.03		23.2.04	יוני04+אוגוסט04	20.12.04			+	16*3.75 13*3.75	2	I	ד"ר בראונשטיין			+
14	16.11.03		23.2.04	אוגוסט04				+	13*3.75 13*3.75	2	I				+
15	16.11.03		23.2.04	אוגוסט04				+	13*3.75 13*3.75	2	I				+
47	30.11.03		23.2.04	ייוני04				+	10*3.75 10*3.75	2	I				+			24.8.04	לפני החשיפה	30756	1
48	30.11.03		23.2.04	ייוני04				+	10*3.75 10*3.75	2	I				+
46	30.11.03		23.2.04	יוני04				+	11*3.75	1	I				+			22.3.04	לפני החשיפה	30763	1
14	15.2.04		23.2.04	אוגוסט04	23.8.04			+	13*3.75 13*4.20 13*4.20	3	I	ד"ר יהלום			+
15	15.2.04		23.2.04	אוגוסט04	23.8.04			+	13*3.75 13*4.20 13*4.20	3	I	ד"ר יהלום			+
16	15.2.04		23.2.04	אוגוסט04	23.8.04			+	13*3.75 13*4.20 13*4.20	3	I	ד"ר יהלום			+
46	9.11.03		23.2.04	יוני04	21.6.04			+	13*3.75 13*3.75 11*3.75	3	I	ד"ר שושני			+
47	9.11.03		23.2.04	יוני04	21.6.04			+	13*3.75 13*3.75 11*3.75	3	I	ד"ר שושני			+
45	9.10.03		23.2.04	יוני04	19.4.04			+	11*3.75	1	I	ד"ר בלינדר			+
14	7.12.03		23.2.04	אוגוסט04	9.8.04			+	13*3.75	1	I	ד"ר ניצן			+
14	14.8.03	23.2.04	23.2.04	נובמבר04	6.12.04			+	13*3.75	1	I	ד"ר זוהר			+
42	-	23.2.04	23.2.04	נובמבר04			+		13*3.75 13*3.75	2					+
43	-	23.2.04	23.2.04	נובמבר04			+		13*3.75 13*3.75	2					+
36	-		1.3.04	יוני04			+		13*3.75	1					+
42	20.10.03		1.3.04	יןני04				+	16*3.30	1	I				+			4.4.04	לפני החשיפה	30290	1
14	19.10.03		1.3.04	אוגוסט04	23.8.04			+	13*3.75	1	I	ד"ר שרן			+
16	7.12.03		1.3.04	אוגוסט04	7.6.04			+	11*4.20 13*4.20	2	I	ד"ר בראונשטיין			+
17	7.12.03		1.3.04	אוגוסט04	7.6.04			+	11*4.20 13*4.20	2	I	ד"ר בראונשטיין			+
14	6.7.03		1.3.04	אוגוסט04	6.9.04			+	16*3.75 13*3.75	2	I	ד"ר ניצן			+
15	6.7.03		1.3.04	אוגוסט04	6.9.04			+	16*3.75 13*3.75	2	I	ד"ר ניצן			+
25	31.8.03		1.3.04	אוגוסט04				+	13*4.20 13*4.20	2	I				+
26	31.8.03		1.3.04	אוגוסט04				+	13*4.20 13*4.20	2	I				+
36	19.3.03		1.3.04	יוני04	28.6.04			+	11*4.20	1	I	ד"ר חלד			+
36	30.11.03		1.3.04	יוני04	30.8.04			+	11*3.75 11*3.75 13*3.75	3	I	ד"ר גבעול			+
37	30.11.03		1.3.04	יוני04	30.8.04			+	11*3.75 11*3.75 13*3.75	3	I	ד"ר גבעול			+
14	30.11.03		1.3.04	אוגוסט04	30.8.04			+	16*3.75 16*3.75	2	I	ד"ר גבעול			+
24	30.11.03		1.3.04	אוגוסט04	30.8.04			+	16*3.75 16*3.75	2	I	ד"ר גבעול			+
24	9.11.03		1.3.04	אוגוסט04				+	13*3.75	1	I				+			3.5.04	לפני החשיפה	40052	1
35	-	7.6.04	1.3.04	יוני04	1.6.04			+	13*3.30 13*3.30 13*3.30	3	I	ד"ר יהלום			+
36	-	7.6.04	1.3.04	יוני04	1.6.04			+	13*3.30 13*3.30 13*3.30	3	I	ד"ר יהלום			+
37	-	7.6.04	1.3.04	יוני04	1.6.04			+	13*3.30 13*3.30 13*3.30	3	I	ד"ר יהלום			+			27.7.04	בזמן החשיפה	30418	1
24	21.12.03		1.3.04	אוגוסט04	20.9.04			+	13*3.30 13*3.75	2	I	ד"ר חלד			+
14	21.12.03		1.3.04	אוגוסט04	20.9.04			+	13*3.30 13*3.75	2	I	ד"ר חלד			+
14	16.11.03		1.3.04	אוגוסט04			+		13*3.75	1					+
15	27.7.03		1.3.04	אוגוסט04	6.9.04		+		15*3.75	1		ד"ר ניצן			+
41	-	8.3.04	8.3.04	נובמבר04			+		13*3.75 13*3.75 11.5*3.75	3					+
43	-	8.3.04	8.3.04	נובמבר04			+		13*3.75 13*3.75 11.5*3.75	3					+
45	-	8.3.04	8.3.04	נובמבר04			+		13*3.75 13*3.75 11.5*3.75	3					+
11	2.11.03	8.3.04	8.3.04	נובמבר04	25.10.04			+	16*3.75 16*3.75	2	I	ד"ר יהלום			+
12	2.11.03	8.3.04	8.3.04	נובמבר04	25.10.04			+	16*3.75 16*3.75	2	I	ד"ר יהלום			+
13	1.9.03	8.3.04(מהרמוס)		נובמבר04											+
12	1.9.03	8.3.04(מהרמוס)		נובמבר04											+
11	1.9.03	8.3.04(מהרמוס)		נובמבר04											+
21	1.9.03	8.3.04(מהרמוס)		נובמבר04											+
22	1.9.03	8.3.04(מהרמוס)		נובמבר04											+
23	1.9.03	8.3.04(מהרמוס)		נובמבר04											+
13	4.1.04		8.3.04	אוגוסט04	26.7.04			+	13*3.75	1	5MF	ד"ר שוחט			+			9.8.04	לאחר החשיפה (בזמן שיקום)	30460	1
23	4.1.04		8.3.04	אוגוסט04	26.7.04			+	13*3.75	1	5MF	ד"ר שוחט			+			26.7.04	בזמן החשיפה	30460	1
15	-		8.3.04	אוגוסט04				+	13*4.20 13*4.20	2	I				+
16	-		8.3.04	אוגוסט04				+	13*4.20 13*4.20	2	I				+
14	2.11.03		8.3.04	אוגוסט04	30.8.04			+	13*3.75 13*3.75 13*3.75	3	I	ד"ר שושני			+
15	2.11.03		8.3.04	אוגוסט04	30.8.04			+	13*3.75 13*3.75 13*3.75	3	I	ד"ר שושני			+
16	2.11.03		8.3.04	אוגוסט04	30.8.04			+	13*3.75 13*3.75 13*3.75	3	I	ד"ר שושני			+			2.9.04	לאחר החשיפה (בזמן שיקום)	31185	1
15	21.12.03		8.3.04	אוגוסט04	16.8.04			+	13*3.75	1	I	ד"ר חלד			+
25	8.2.04		8.3.04	אוגוסט04	6.9.04			+	13*3.75	1	I	ד"ר בראונשטיין			+
36	-		8.3.04	יוני04	12.7.04			+	13*3.75 11*4.20	2	I	ד"ר בראונשטיין			+
35	-		8.3.04	יוני04	12.7.04			+	13*3.75 11*4.20	2	I	ד"ר בראונשטיין			+
21	-		17.2.04	אוגוסט04	11.8.04			+	13*3.75	1	I	ד"ר קרני		+
11	7.2.04		25.2.04	אוגוסט04	11.11.04			+	13*3.75	1	I	ד"ר שדה		+
15	10.12.04	25.2.04	25.2.04	נובמבר04	17.11.04			+	13*3.75	1	I	ד"ר קרני		+
42	10.2.04		25.2.04	יוני04	8.6.04			+	13*3.30 13*3.30	2	I	ד"ר קרני		+				2.8.04	לאחר החשיפה (בזמן שיקום)	30774 30774	1
31	10.2.04		25.2.04	יוני04	8.6.04			+	13*3.30 13*3.30	2	I	ד"ר קרני		+				2.8.04	לאחר החשיפה (בזמן שיקום)	30774 30774	1
24	11.1.04		10.3.04	אוגוסט04	1.12.04			+	13*3.75	1	I	ד"ר קרני		+
12	-		15.3.04	ספטמבר04			+		13*3.75	1					+			21.6.04	לפני החשיפה		1
11	22.2.04	15.3.04		ינואר05											+
12	21.12.03		15.3.04	ספטמבר04	6.9.04			+	16*3.75 16*3.75	2	MF5	ד"ר בראונשטיין			+			19.9.04	לאחר החשיפה (בזמן שיקום)	30220 30220	1
21	21.12.03		15.3.04	ספטמבר04	6.9.04			+	16*3.75 16*3.75	2	MF5	ד"ר בראונשטיין			+			19.9.04	לאחר החשיפה (בזמן שיקום)	30220 30220	1
37	21.12.03		15.3.04	יולי04	13.7.04			+	13*3.75 13*3.75	2	I	ד"ר בראונשטיין			+
36	21.12.03		15.3.04	יולי04	13.7.04			+	13*3.75 13*3.75	2	I	ד"ר בראונשטיין			+
25	21.12.03		15.3.04	ספטמבר04	13.9.04			+	10*3.75	1	I	ד"ר ניצן			+
34	21.12.03		15.3.04	יולי04	21.6.04			+	16*3.75 11*3.75 10*3.75 10*3.75	4	I	ד"ר גבעול			+			28.9.04	לאחר החשיפה (בזמן שיקום)	22624 30373 31115 30931	1
35	21.12.03		15.3.04	יולי04	21.6.04			+	16*3.75 11*3.75 10*3.75 10*3.75	4	I	ד"ר גבעול			+			28.9.04	לאחר החשיפה (בזמן שיקום)	22624 30373 31115 30931	1
36	21.12.03		15.3.04	יולי04	21.6.04			+	16*3.75 11*3.75 10*3.75 10*3.75	4	I	ד"ר גבעול			+			28.9.04	לאחר החשיפה (בזמן שיקום)	22624 30373 31115 30931	1
37	21.12.03		15.3.04	יולי04	21.6.04			+	16*3.75 11*3.75 10*3.75 10*3.75	4	I	ד"ר גבעול			+			28.9.04	לאחר החשיפה (בזמן שיקום)	22624 30373 31115 30931	1
45	-		15.3.04	יולי04	19.7.04			+	13*3.75	1	I	ד"ר שושני			+
36	22.12.03		15.3.04	יולי04				+	11*3.75 11*3.75	2	I				+
35	22.12.03		15.3.04	יולי04				+	11*3.75 11*3.75	2	I				+
24	29.2.04		15.3.04	ספטמבר04				+	13*3.75	1	I				+
36	-		15.3.04	יולי04	26.7.04			+	13*3.75	1	I	ד"ר יהלום			+
47	-		15.3.04	יולי04	12.7.04			+	13*4.20 13*3.75	2	I	ד"ר חלד			+
46	-		15.3.04	יולי04	12.7.04			+	13*4.20 13*3.75	2	I	ד"ר חלד			+
11	17.9.04		15.3.04	ספטמבר04	6.9.04			+	16*3.75	1	I	ד"ר חלד			+
42	14.3.04		15.3.04	ינואר05			+		15*3.75 15*3.75	2					+
32	14.3.04		15.3.04	ינואר05			+		15*3.75 15*3.75	2					+
31	-		7.3.04	יוני04			+		10*3.75 11*3.75 13*3.75 13*3.75	4					+
32	-		7.3.04	יוני04			+		10*3.75 11*3.75 13*3.75 13*3.75	4					+
34	-		7.3.04	יוני04			+		10*3.75 11*3.75 13*3.75 13*3.75	4					+
33	-		7.3.04	יוני04			+		10*3.75 11*3.75 13*3.75 13*3.75	4					+
11	21.12.03		22.3.04	ספטמבר04	20.9.04			+	16*3.75 16*3.75 13*3.75 13*3.75	4	I	ד"ר בראונשטיין			+
12	21.12.03		22.3.04	ספטמבר04	20.9.04			+	16*3.75 16*3.75 13*3.75 13*3.75	4	I	ד"ר בראונשטיין			+
21	21.12.03		22.3.04	ספטמבר04	20.9.04			+	16*3.75 16*3.75 13*3.75 13*3.75	4	I	ד"ר בראונשטיין			+
22	21.12.03		22.3.04	ספטמבר04	20.9.04			+	16*3.75 16*3.75 13*3.75 13*3.75	4	I	ד"ר בראונשטיין			+
11	22.2.04		22.3.04	ספטמבר04	22.11.04			+	16*3.75	1	I	ד"ר ניצן			+
36	11.12.03		22.3.04	יולי04	26.7.04			+	10*37.5 10*3.75 13*3.30	3	I	ד"ר שושני			+
37	11.12.03		22.3.04	יולי04	26.7.04			+	10*37.5 10*3.75 13*3.30	3	I	ד"ר שושני			+
38	11.12.03		22.3.04	יולי04	26.7.04			+	10*37.5 10*3.75 13*3.30	3	I	ד"ר שושני			+
44	4.1.04		22.3.04	יולי04				+	13*3.75 10*3.75 10*3.75	3	I				+
45	4.1.04		22.3.04	יולי04				+	13*3.75 10*3.75 10*3.75	3	I				+			4.10.04	בזמן החשיפה	31115	1
46	4.1.04		22.3.04	יולי04				+	13*3.75 10*3.75 10*3.75	3	I				+
15	17.3.04	22.3.04	22.3.04	דצמבר04			+		11.5*5.0	1					+
23	28.12.03		22.3.04	ספטמבר04	6.9.04			+	13*3.75 13*3.75	2	I	ד"ר ניצן			+
13	28.12.03		22.3.04	ספטמבר04	6.9.04			+	13*3.75 13*3.75	2	I	ד"ר ניצן			+
24	21.12.03		22.3.04	ספטמבר+יולי04	30.8.04			+	16*3.30 13*3.30 13*3.3.0 11*3.75	4	I	ד"ר בראונשטיין			+
46	21.12.03		22.3.04	ספטמבר+יולי04	30.8.04			+	16*3.30 13*3.30 13*3.3.0 11*3.75	4	I	ד"ר בראונשטיין			+
47	21.12.03		22.3.04	ספטמבר+יולי04	30.8.04			+	16*3.30 13*3.30 13*3.3.0 11*3.75	4	I	ד"ר בראונשטיין			+
48	21.12.03		22.3.04	ספטמבר+יולי04	30.8.04			+	16*3.30 13*3.30 13*3.3.0 11*3.75	4	I	ד"ר בראונשטיין			+
11	29.2.04		22.3.04	ספטמבר04	27.9.04			+	16*3.30 16*3.30	2	I	ד"ר ניצן			+
12	29.2.04		22.3.04	ספטמבר04	27.9.04			+	16*3.30 16*3.30	2	I	ד"ר ניצן			+
36	13.11.03		22.3.04	יולי04	19.7.04			+	13*3.75 13*3.75	2	I	ד"ר ניצן			+
35	13.11.03		22.3.04	יולי04	19.7.04			+	13*3.75 13*3.75	2	I	ד"ר ניצן			+
34	16.11.03		22.3.04	יולי04	16.8.04			+	13*3.75 13*3.75 13*3.75	3	I	ד"ר שושני			+
35	16.11.03		22.3.04	יולי04	16.8.04			+	13*3.75 13*3.75 13*3.75	3	I	ד"ר שושני			+
36	16.11.03		22.3.04	יולי04	16.8.04			+	13*3.75 13*3.75 13*3.75	3	I	ד"ר שושני			+
32	-		22.3.04	יולי04			+		13*3.75 13*3.75	2					+
42	-		22.3.04	יולי04			+		13*3.75 13*3.75	2					+
24	1.9.03		29.3.04	יולי04				+	13*4.20 11*3.75 16*3.75	3	I				+
25	1.9.03		29.3.04	יולי04				+	13*4.20 11*3.75 16*3.75	3	I				+
26	1.9.03		29.3.04	יולי04				+	13*4.20 11*3.75 16*3.75	3	I				+
11	30.11.03		29.3.04	ספטמבר04	30.8.04		+		11.5*3.75 11.5*3.75 13*3.75 13*3.75	4		ד"ר שושני			+
12	30.11.03		29.3.04	ספטמבר04	30.8.04		+		11.5*3.75 11.5*3.75 13*3.75 13*3.75	4		ד"ר שושני			+
13	30.11.03		29.3.04	ספטמבר04	30.8.04		+		11.5*3.75 11.5*3.75 13*3.75 13*3.75	4		ד"ר שושני			+
21	30.11.03		29.3.04	ספטמבר04	30.8.04		+		11.5*3.75 11.5*3.75 13*3.75 13*3.75	4		ד"ר שושני			+
22	30.11.03		29.3.04	ספטמבר04	30.8.04		+		11.5*3.75 11.5*3.75 13*3.75 13*3.75	4		ד"ר שושני			+
12	14.3.04		29.3.04	ספטמבר04	27.9.04			+	16*3.75	1	I	ד"ר גבעול			+			25.10.04	לאחר החשיפה (בזמן שיקום)	30220	1
21	9.11.03		29.3.04	ספטמבר04	25.10.04			+	16*3.330	1	I	ד"ר שושני			+
34	16.11.03	29.3.04	29.3.04	נובמבר04	27.9.04			+	13*3.75 16*3.75 16*4.20	3	I	ד"ר ניצן			+
35	16.11.03	29.3.04	29.3.04	נובמבר04	27.9.04			+	13*3.75 16*3.75 16*4.20	3	I	ד"ר ניצן			+
36	16.11.03	29.3.04	29.3.04	נובמבר04	27.9.04			+	13*3.75 16*3.75 16*4.20	3	I	ד"ר ניצן			+
33	21.12.03		29.3.04	יולי04	26.7.04		+		13*3.75 13*3.75	2		ד"ר בראונשטיין			+
43	21.12.03		29.3.04	יולי04	26.7.04		+		13*3.75 13*3.75	2		ד"ר בראונשטיין			+
14	24.11.02	29.3.04		נובמבר04											+
15	24.11.02	29.3.04		נובמבר04											+
46	28.12.03		29.3.04	יולי04	28.6.04			+	13*3.75 13*3.75 13*3.75	3	I	ד"ר דבורי			+
47	26.10.03		29.3.04	יולי04	20.9.04			+	13*3.75 13*3.75	2	I	ד"ר גבעול			+
44	14.3.04		29.3.04	יולי04	30.8.04			+	13*3.30	1	I	ד"ר גבעול			+
46	-		29.3.04	יולי04	28.6.04		+		13*5.0	1		ד"ר שושני			+
21	-		17.2.04	אוגוסט04	24.5.04			+	13*3.75	1	I	ד"ר קרני		+
15	-	17.3.04	17.3.04	דצמבר04	28.12.04			+	13*3.30	1	I	ד"ר קרני		+
14	-	17.3.04	17.3.04	דצמבר04	28.12.04			+	13*3.30	1	I	ד"ר קרני		+
24	11.3.03		17.3.04	ספטמבר04	21.9.04			+	13*3.75 13*3.75	1	I	ד"ר קרני		+				30.12.04	לאחר חשיפה (בזמן שיקום)	31415	1
25	11.3.03		17.3.04	ספטמבר04	21.9.04			+	13*3.75 13*3.75	1	I	ד"ר קרני		+
25	7.12.03		17.3.04	ספטמבר04	21.12.04			+	13*4.20			ד"ר קרני		+
26	7.12.03		17.3.04	ספטמבר04	21.12.04			+	13*4.20			ד"ר קרני		+
35	10.3.03		24.3.04	יולי04	21.7.04			+	13*3.75 13*3.75 13*3.30	3	I	ד"ר קרני		+
36	10.3.03		24.3.04	יולי04	21.7.04			+	13*3.75 13*3.75 13*3.30	3	I	ד"ר קרני		+
42	15.2.04		13.4.04	אוקטובר04	19.10.04			+	13*3.30 13*3.30	2	I	ד"ר קרני		+				12.5.04	לפני החשיפה	40051	1
32	15.2.04		13.4.04	אוקטובר04	19.10.04			+	13*3.30 13*3.30	2	I	ד"ר קרני		+
36	14.1.04		13.4.04	יולי04	14.7.04			+	13*3.75	1	I	ד"ר קרני		+
12	25.1.04		14.4.04	אוקטובר04	21.12.04			+	13*3.75	1	I	ד"ר קרני		+
45	28.11.03	14.4.04	14.4.04	דצמבר04	21.7.04			+	13*3.75 13*3.75 13*3.75	1	I	ד"ר קרני		+				27.7.04	לאחר החשיפה (בזמן שיקום)	40156	1
46	28.11.03	14.4.04	14.4.04	דצמבר04	21.7.04			+	13*3.75 13*3.75 13*3.75	1	I	ד"ר קרני		+
47	28.11.03	14.4.04	14.4.04	דצמבר04	21.7.04			+	13*3.75 13*3.75 13*3.75	1	I	ד"ר קרני		+
34	9.11.03	18.4.04	18.4.04	דצמבר04	29.12.04			+	13*3.75 13*3.75 13*3.75 13*3.30	4	I	ד"ר קרני		+
35	9.11.03	18.4.04	18.4.04	דצמבר04	29.12.04			+	13*3.75 13*3.75 13*3.75 13*3.30	4	I	ד"ר קרני		+
36	9.11.03	18.4.04	18.4.04	דצמבר04	29.12.04			+	13*3.75 13*3.75 13*3.75 13*3.30	4	I	ד"ר קרני		+
37	9.11.03	18.4.04	18.4.04	דצמבר04	29.12.04			+	13*3.75 13*3.75 13*3.75 13*3.30	4	I	ד"ר קרני		+
22	16.11.03		19.4.04	אוקטובר04	27.9.04			+	13*3.75	1	5MF	ד"ר ניצן			+			22.12.04	לפני חשיפה	40154	1
32	16.11.03	19.4.04		אוקטובר04	29.11.04			+	16*3.30 16*3.30	2	I	ד"ר ניצן			+
42	16.11.03	19.4.04		אוקטובר04	29.11.04			+	16*3.30 16*3.30	2	I	ד"ר ניצן			+
12	17.3.04	19.4.04	19.4.04	דצמבר04			+		15*3.75 15*3.75 15*5.0	3					+
11	17.3.04	19.4.04	19.4.04	דצמבר04			+		15*3.75 15*3.75 15*5.0	3					+			4.10.04	לאחר החשיפה (בזמן שיקום)	12868	1
21	17.3.04	19.4.04	19.4.04	דצמבר04			+		15*3.75 15*3.75 15*5.0	3					+
22	17.3.04	19.4.04	19.4.04	דצמבר04			+		15*3.75 15*3.75 15*5.0	3					+
13	4.1.04		19.4.04	אוקטובר04	18.10.04		+		15*3.75 15*3.75	2		ד"ר שוחט			+
23	4.1.04		19.4.04	אוקטובר04	18.10.04		+		15*3.75 15*3.75	2		ד"ר שוחט			+
13	21.12.03		19.4.04	אוקטובר04	22.11.04			+	16*3.75	1	I	ד"ר בראונשטיין			+
47	22.2.04		19.4.04	דצמבר04	18.10.04			+	13*3.75 13*3.75 11*3.75	3	I	ד"ר שושני			+
46	22.2.04		19.4.04	דצמבר04	18.10.04			+	13*3.75 13*3.75 11*3.75	3	I	ד"ר שושני			+
11	22.2.04		19.4.04	אוקטובר04	18.10.04			+	16*4.20	1	5MF	ד"ר שושני			+			27.10.04	לאחר החשיפה (בזמן שיקום)	30874	1
13	17.8.03		19.4.04	דצמבר04	8.11.04		+		15*3.75 15*3.75 15*3.75 15*3.75	4		ד"ר שושני			+
15	17.8.03		19.4.04	דצמבר04	8.11.04		+		15*3.75 15*3.75 15*3.75 15*3.75	4		ד"ר שושני			+
23	17.8.03		19.4.04	דצמבר04	8.11.04		+		15*3.75 15*3.75 15*3.75 15*3.75	4		ד"ר שושני			+
25	17.8.03		19.4.04	דצמבר04	8.11.04		+		15*3.75 15*3.75 15*3.75 15*3.75	4		ד"ר שושני			+
24	21.12.03	19.4.04	19.4.04	דצמבר04				+	16*3.75 13*3.75	2	I				+
25	21.12.03	19.4.04	19.4.04	דצמבר04				+	16*3.75 13*3.75	2	I				+			26.9.04	לאחר החשיפה (בזמן שיקום)	40156	1
24	7.9.03	19.4.04	19.4.04	דצמבר04				+	11*3.75	1	I				+
12	11.12.04		19.4.04	אוקטובר04	18.10.04			+	16*3.75 16*3.75 16*3.75 16*3.75	4	I	ד"ר ניצן			+
11	11.12.04		19.4.04	אוקטובר04	18.10.04			+	16*3.75 16*3.75 16*3.75 16*3.75	4	I	ד"ר ניצן			+
21	11.12.04		19.4.04	אוקטובר04	18.10.04			+	16*3.75 16*3.75 16*3.75 16*3.75	4	I	ד"ר ניצן			+
22	11.12.04		19.4.04	אוקטובר04	18.10.04			+	16*3.75 16*3.75 16*3.75 16*3.75	4	I	ד"ר ניצן			+
35	4.1.04		19.4.04	אוגוסט04	6.9.04			+	11*3.75	1	I	ד"ר ניצן			+
45	21.12.03		19.4.04	אוגוסט04	25.10.04			+	11*3.75	1	I	ד"ר שושני			+
37	-		20.4.04	אוגוסט04				+	13*3.75 11*3.75	2	I			+				9.8.04	לפני החשיפה	40156 40125	1
36	-		20.4.04	אוגוסט04				+	13*3.75 11*3.75	2	I			+				9.8.04	לפני החשיפה	40156 40125	1
37	-		20.4.04	אוגוסט04	25.8.04			+	13*3.75 13*3.75 13*3.75	3	I	ד"ר קרני		+
36	-		20.4.04	אוגוסט04	25.8.04			+	13*3.75 13*3.75 13*3.75	3	I	ד"ר קרני		+
14	21.13.03		3.5.04	אוקטובר04	29.11.04		+		11*3.75 11*3.75 11*3.75 13*3.75	3		ד"ר בראונשטיין			+
12	21.13.03		3.5.04	אוקטובר04	29.11.04		+		11*3.75 11*3.75 11*3.75 13*3.75	3		ד"ר בראונשטיין			+
22	21.13.03		3.5.04	אוקטובר04	29.11.04		+		11*3.75 11*3.75 11*3.75 13*3.75	3		ד"ר בראונשטיין			+
24	21.13.03		3.5.04	אוקטובר04	29.11.04		+		11*3.75 11*3.75 11*3.75 13*3.75	3		ד"ר בראונשטיין			+
21	26.10.03	3.5.04		ינואר05											+
14	19.10.03		3.5.04	אוקטובר04	15.11.04			+	11*3.75	1	I	ד"ר דבורי			+
37	28.12.03		3.5.04	יולי04	30.8.04			+	13*3.75 11*4.20 11*3.75	3	I	ד"ר בראונשטיין			+		5.1.05
36	28.12.03		3.5.04	יולי04	30.8.04			+	13*3.75 11*4.20 11*3.75	3	I	ד"ר בראונשטיין			+		5.1.05		לאחר חשיפה (בזמן השיקום)	40355	1
36	31.8.03		3.5.04	יולי04				+	11*3.75 10*4.20	2	I				+
37	31.8.03		3.5.04	יולי04				+	11*3.75 10*4.20	2	I				+
35	2.3.04		3.5.04	יןלי04	16.8.04			+	13*3.75 16*4.20	2	I	ד"ר שושני			+
36	2.3.04		3.5.04	יןלי04	16.8.04			+	13*3.75 16*4.20	2	I	ד"ר שושני			+
14	2.10.03		3.5.04	אוקטובר04	15.11.04			+	11*3.75	1	I	ד"ר ניצן			+
11	11.1.04		3.5.04	אוקטובר04	20.12.04		+		10*3.75 11*3.75 13*3.75 10*3.75	4		ד"ר גבעול			+
13	11.1.04		3.5.04	אוקטובר04	20.12.04		+		10*3.75 11*3.75 13*3.75 10*3.75	4		ד"ר גבעול			+
21	11.1.04		3.5.04	אוקטובר04	20.12.04		+		10*3.75 11*3.75 13*3.75 10*3.75	4		ד"ר גבעול			+
23	11.1.04		3.5.04	אוקטובר04	20.12.04		+		10*3.75 11*3.75 13*3.75 10*3.75	4		ד"ר גבעול			+
15	4.1.04	3.5.04	3.5.04	ינואר05	3.1.05			+	11*3.75	1	I	ד"ר גבעול			+
32	28.12.03	3.5.04	3.5.04	ינואר05	18.10.04			+	16*3.30 16*3.30	2	I	ד"ר ניצן			+
42	28.12.03	3.5.04	3.5.04	ינואר05	18.10.04			+	16*3.30 16*3.30	2	I	ד"ר ניצן			+
11	9.11.03		3.5.04	אוקטובר04	6.12.04			+	16*3.75	1	I	ד"ר בראונשטיין			+
15	8.2.04		3.5.04	אוקטובר04	1.11.04			+	13*3.75	1	I	ד"ר גבעול			+
21	8.2.04	3.5.04	3.5.04	ינואר05				+	16*4.20	1	5MF				+
14	4.1.04		3.5.04	אוקטובר04	15.11.04			+	13*3.75	1	I	ד"ר שושני			+
35	28.12.03		3.5.04	יולי04	20.9.04			+	10*3.75 10*3.75 11*3.75	3	I	ד"ר בראונשטיין			+
36	28.12.03		3.5.04	יולי04	20.9.04			+	10*3.75 10*3.75 11*3.75	3	I	ד"ר בראונשטיין			+
37	28.12.03		3.5.04	יולי04	20.9.04			+	10*3.75 10*3.75 11*3.75	3	I	ד"ר בראונשטיין			+
11	15.2.04	10.5.04		פברואר05											+
12	15.2.04	10.5.04		פברואר05											+
21	15.2.04	10.5.04		פברואר05											+
22	15.2.04	10.5.04		פברואר05											+
22	8.2.04		10.5.04	נובמבר04	4.10.04			+	16*3.75	1	I	ד"ר בראונשטיין			+
46	-		10.5.04	ספטמבר04			+		13*3.75	1					+
24	18.4.04		10.5.04	ספטמבר+נובמבר04	15.11.04			+	13*3.75 11*3.75 13*3.30	3	I	ד"ר בראונשטיין			+
46	18.4.04		10.5.04	ספטמבר+נובמבר04	15.11.04			+	13*3.75 11*3.75 13*3.30	3	I	ד"ר בראונשטיין			+
47	18.4.04		10.5.04	ספטמבר+נובמבר04	15.11.04			+	13*3.75 11*3.75 13*3.30	3	I	ד"ר בראונשטיין			+
45	19.1.04		10.5.04	ספטמבר04	11.10.04			+	13*3.75 13*3.75 11*4.20	3	I	ד"ר שושני			+
46	19.1.04		10.5.04	ספטמבר04	11.10.04			+	13*3.75 13*3.75 11*4.20	3	I	ד"ר שושני			+
47	19.1.04		10.5.04	ספטמבר04	11.10.04			+	13*3.75 13*3.75 11*4.20	3	I	ד"ר שושני			+
24	-	10.5.04		פברואר05				+							+
24	14.12.03		10.5.04	נובמבר04	8.11.04			+	16*3.30 10*4.20	2	I	ד"ר שושני			+
25	14.12.03		10.5.04	נובמבר04	8.11.04			+	16*3.30 10*4.20	2	I	ד"ר שושני			+
34	-		11.5.04	ספטמבר04	24.10.04			+	13*3.75	1	I	ד"ר קרני		+
36	4.2.04		11.5.04	ספטמבר04	27.7.04			+	13*4.20 13*4.20	2	I	ד"ר קרני		+				18.10.04	לאחר החשיפה (בזמן שיקום)	31127 31127	2
45	-		11.5.04	ספטמבר04				+	13*3.75 13*3.75 13*3.30 13*3.30	4	I			+				15.7.04,5.8.04	לפני החשיפה	40052 40052 40051 40051	1
46	-		11.5.04	ספטמבר04				+	13*3.75 13*3.75 13*3.30 13*3.30	4	I			+				15.7.04,5.8.04	לפני החשיפה	40052 40052 40051 40051	1
47	-		11.5.04	ספטמבר04				+	13*3.75 13*3.75 13*3.30 13*3.30	4	I			+				15.7.04,5.8.04	לפני החשיפה	40052 40052 40051 40051	1
24	-		11.5.04	נובמבר04	17.11.04			+	13*3.75	1	I	ד"ר קרני		+
35	8.6.03		17.5.04	ספטמבר04	20.9.04			+	10*4.20	1	I	ד"ר חלד			+
22	11.1.04		17.5.04	נובמבר04	8.11.04			+	16*3.30	1	I	ד"ר חלד			+			8.11.04	בזמן החשיפה	31015	1
32	11.1.04	17.5.04		פברואר05											+
42	11.1.04	17.5.04		פברואר05											+
46	28.3.04		17.5.04	ספטמבר04	27.9.04			+	13*3.30 10*3.75 11*3.75	3	I	ד"ר ניצן			+
47	28.3.04		17.5.04	ספטמבר04	27.9.04			+	13*3.30 10*3.75 11*3.75	3	I	ד"ר ניצן			+
48	28.3.04		17.5.04	ספטמבר04	27.9.04			+	13*3.30 10*3.75 11*3.75	3	I	ד"ר ניצן			+
46	16.11.03		17.5.04	ספטמבר04	27.9.04			+	13*3.75 13*3.75	2	I	ד"ר ברואנשטיין			+
47	16.11.03		17.5.04	ספטמבר04	27.9.04			+	13*3.75 13*3.75	2	I	ד"ר ברואנשטיין			+
25	28.1.04	17.5.04	17.5.04	פברואר05	18.10.04			+	10*3.30 13*3.30	2	I	ד"ר שוחט			+
24	28.1.04	17.5.04	17.5.04	פברואר05	18.10.04			+	10*3.30 13*3.30	2	I	ד"ר שוחט			+
37	-		17.5.04	ספטמבר04	13.12.04			+	11*4.20 11*4.20	2	I	ד"ר חלד			+
36	-		17.5.04	ספטמבר04	13.12.04			+	11*4.20 11*4.20	2	I	ד"ר חלד			+
37	2.11.03		17.5.04	ספטמבר04	25.10.04			+	13*3.30 13*3.30	2	I	ד"ר יהלום			+
36	2.11.03		17.5.04	ספטמבר04	25.10.04			+	13*3.30 13*3.30	2	I	ד"ר יהלום			+
47	15.2.04		17.5.04	ספטמבר04	16.8.04			+	11*3.75 13*3.75 13*3.75	3	I	ד"ר שושני			+			15.2.04	בזמן החשיפה	40125	1
46	15.2.04		17.5.04	ספטמבר04	16.8.04			+	11*3.75 13*3.75 13*3.75	3	I	ד"ר שושני			+
14	-		17.5.04	נובמבר04				+	16*3.75 16*3.75 16*3.75 16*3.75 13*3.75 13*3.75 13*3.75 11*3.75	8	I				+
13	-		17.5.04	נובמבר04				+	16*3.75 16*3.75 16*3.75 16*3.75 13*3.75 13*3.75 13*3.75 11*3.75	8	I				+
12	-		17.5.04	נובמבר04				+	16*3.75 16*3.75 16*3.75 16*3.75 13*3.75 13*3.75 13*3.75 11*3.75	8	I				+
11	-		17.5.04	נובמבר04				+	16*3.75 16*3.75 16*3.75 16*3.75 13*3.75 13*3.75 13*3.75 11*3.75	8	I				+
21	-		17.5.04	נובמבר04				+	16*3.75 16*3.75 16*3.75 16*3.75 13*3.75 13*3.75 13*3.75 11*3.75	8	I				+
22	-		17.5.04	נובמבר04				+	16*3.75 16*3.75 16*3.75 16*3.75 13*3.75 13*3.75 13*3.75 11*3.75	8	I				+
23	-		17.5.04	נובמבר04				+	16*3.75 16*3.75 16*3.75 16*3.75 13*3.75 13*3.75 13*3.75 11*3.75	8	I				+
24	-		17.5.04	נובמבר04				+	16*3.75 16*3.75 16*3.75 16*3.75 13*3.75 13*3.75 13*3.75 11*3.75	8	I				+
13	11.1.04		17.5.04	נובמבר04	20.12.04			+	13*4.20	1	5MF	ד"ר יהלום			+
12	-		17.5.04	נובמבר04	5.12.04			+	16*3.75 16*3.30 16*3.30 16*3.30	4	I	ד"ר שדה			+
11	-		17.5.04	נובמבר04	5.12.04			+	16*3.75 16*3.30 16*3.30 16*3.30	4	I	ד"ר שדה			+
21	-		17.5.04	נובמבר04	5.12.04			+	16*3.75 16*3.30 16*3.30 16*3.30	4	I	ד"ר שדה			+
22	-		17.5.04	נובמבר04	5.12.04			+	16*3.75 16*3.30 16*3.30 16*3.30	4	I	ד"ר שדה			+
14		17.5.04		אוגוסט04											+
24		17.5.04		פברואר05											+
33	-		18.5.04	ספטמבר04			+		13*3.25 13*3.25	2				+
43	-		18.5.04	ספטמבר04			+		13*3.25 13*3.25	2				+
25	12.5.04		18.5.04	נובמבר04	24.11.04			+	13*3.30	1	I	ד"ר קרני		+
36	-		18.5.04	ספטמבר04				+	13*3.30	1	I			+				1.11.04	לפני החשיפה	40051	1
15	25.1.04		18.5.04	נובמבר04	8.12.04			+	16*3.75	1	I	ד"ר קרני		+
12	-	6.1.04		אוגוסט04										+
37	-	19.5.04	19.5.04	פברואר05	30.11.04			+	13*3.75 13*3.75	2	I	ד"ר קרני		+
36	-	19.5.04	19.5.04	פברואר05	30.11.04			+	13*3.75 13*3.75	2	I	ד"ר קרני		+
46	11.1.04		19.5.04	ספטמבר04	23.8.04			+	11*3.75 13*3.75 13*3.75	3	I	ד"ר קרני		+				15.11.04	לאחר החשיפה (בזמן שיקום)	40156 40156 40125	1
47	11.1.04		19.5.04	ספטמבר04	23.8.04			+	11*3.75 13*3.75 13*3.75	3	I	ד"ר קרני		+				15.11.04	לאחר החשיפה (בזמן שיקום)	40156 40156 40125	1
48	11.1.04		19.5.04	ספטמבר04	23.8.04			+	11*3.75 13*3.75 13*3.75	3	I	ד"ר קרני		+				15.11.04	לאחר החשיפה (בזמן שיקום)	40156 40156 40125	1
46			19.5.04	ספטמבר04	19.10.04			+	13*4.20 13*4.20	2	I	ד"ר קרני		+				27.10.04	לאחר חשיפה (בזמן שיקום)	31127 31127	1
47			19.5.04	ספטמבר04	19.10.04			+	13*4.20 13*4.20	2	I	ד"ר קרני		+				27.10.04	לאחר חשיפה (בזמן שיקום)	31127 31127	1
45	28.1.04		24.5.04	ספטמבר04	19.10.04			+	13*3.75 13*3.75 13*3.30	3	I	ד"ר קרני		+
46	28.1.04		24.5.04	ספטמבר04	19.10.04			+	13*3.75 13*3.75 13*3.30	3	I	ד"ר קרני		+
47	28.1.04		24.5.04	ספטמבר04	19.10.04			+	13*3.75 13*3.75 13*3.30	3	I	ד"ר קרני		+
46	25.1.04		24.5.04	ספטמבר04	11.8.04			+	13*3.75 13*4.20	2	I	ד"ר קרני		+
47	25.1.04		24.5.04	ספטמבר04	11.8.04			+	13*3.75 13*4.20	2	I	ד"ר קרני		+
14	18.1.04		24.5.04	נובמבר04	17.11.04			+	13*3.30	1	I	ד"ר קרני		+
15	-		24.5.04	נובמבר04				+	11*3.30 11*3.30 11*4.250 13*3.75	4	I				+			5.7.04	לפני החשיפה	31415	1
16	-		24.5.04	נובמבר04				+	11*3.30 11*3.30 11*4.250 13*3.75	4	I				+			5.7.04	לפני החשיפה	31415
25	-		24.5.04	נובמבר04				+	11*3.30 11*3.30 11*4.250 13*3.75	4	I				+			5.7.04	לפני החשיפה	31415
24	-		24.5.04	נובמבר04				+	11*3.30 11*3.30 11*4.250 13*3.75	4	I				+			5.7.04	לפני החשיפה	31415
25	25.1.04		24.5.04	נובמבר04	15.11.04		+		13*3.75 15*3.75	2		ד"ר שושני			+
23	25.1.04		24.5.04	נובמבר04	15.11.04		+		13*3.75 15*3.75	2		ד"ר שושני			+
21	-		24.5.04	נובמבר04	29.11.04			+	16*3.75 16*3.75	2	I	ד"ר ניצן			+
11	-		24.5.04	נובמבר04	29.11.04			+	16*3.75 16*3.75	2	I	ד"ר ניצן			+
12	8.2.04		24.5.04	נובמבר04	22.11.04			+	13*3.75 13*3.75 13*3.75	3	I	ד"ר שושני			+
13	8.2.04		24.5.04	נובמבר04	22.11.04			+	13*3.75 13*3.75 13*3.75	3	I	ד"ר שושני			+
14	8.2.04		24.5.04	נובמבר04	22.11.04			+	13*3.75 13*3.75 13*3.75	3	I	ד"ר שושני			+
35	19.1.04		24.5.04	ספטמבר04	11.10.04			+	13*3.75 13*4.20	2	I	ד"ר שושני			+
34	19.1.04		24.5.04	ספטמבר04	11.10.04			+	13*3.75 13*4.20	2	I	ד"ר שושני			+
11	11.1.04	24.5.04		פברואר05											+
21	11.1.04	24.5.04		פברואר05											+
45	-		24.5.04	ספטמבר04				+	13*3.75 13*3.75	2	I				+			26.10.04	לפני החשיפה	40052 31415	1
46	-		24.5.04	ספטמבר04				+	13*3.75 13*3.75	2	I				+			26.10.04	לפני החשיפה	40052 31415	1
14	29.6.03		24.5.04	נובמבר04	29.11.04		+		13*3.75 13*3.75 13*3.75 13*3.75	4	I	ד"ר חלד			+
15	29.6.03		24.5.04	נובמבר04	29.11.04		+		13*3.75 13*3.75 13*3.75 13*3.75	4	I	ד"ר חלד			+
16	29.6.03		24.5.04	נובמבר04	29.11.04		+		13*3.75 13*3.75 13*3.75 13*3.75	4	I	ד"ר חלד			+
17	29.6.03		24.5.04	נובמבר04	29.11.04		+		13*3.75 13*3.75 13*3.75 13*3.75	4	I	ד"ר חלד			+
45	-		24.5.04	ספטמבר04	13.9.04			+	10*3.75	1	I	ד"ר חלד			+
46	29.6.04		24.5.04	ספטמבר04			+		13*3.75	1					+
44	9.5.04		24.5.04	ספטמבר04			+		13*3.75 11*3.75 11*3.75	2					+
45	9.5.04		24.5.04	ספטמבר04			+		13*3.75 11*3.75 11*3.75	2					+
36	15.2.04		31.5.04	ספטמבר04	18.10.04			+	11*4.20 13*3.75 13*3.75	3	I	ד"ר ניצן			+
37	15.2.04		31.5.04	ספטמבר04	18.10.04			+	11*4.20 13*3.75 13*3.75	3	I	ד"ר ניצן			+
23	22.1.04		31.5.04	נובמבר04			+		13*3.75	1					+
37	2.11.03		31.5.04	ספטמבר04	27.9.04			+	11*3.75 13*3.75 13*3.75	3	I	ד"ר בלינדר			+
36	2.11.03		31.5.04	ספטמבר04	27.9.04			+	11*3.75 13*3.75 13*3.75	3	I	ד"ר בלינדר			+
11	16.11.04		31.5.04	נובמבר04	29.11.04			+	16*3.75 16*3.75	2	5MF	ד"ר ניצן			+
21	16.11.04		31.5.04	נובמבר04	29.11.04			+	16*3.75 16*3.75	2	5MF	ד"ר ניצן			+
23	8.2.04		31.5.04	נובמבר04				+	13*4.20	1	I				+
23	24.2.04		31.5.04	נובמבר04				+	11*3.75	1	5MF				+			8.11.04	לפני חשיפה	30469	1
15	2.1.04		31.5.04	נובמבר04				+	13*4.20	1	I				+
42	8.2.04		31.5.04	ספטמבר04	9.8.04			+	13*3.30 13*3.30	2	I	ד"ר ניצן			+			27.9.04	לאחר החשיפה (בזמן שיקום)	40051	1
32	8.2.04		31.5.04	ספטמבר04	9.8.04			+	13*3.30 13*3.30	2	I	ד"ר ניצן			+
24	15.2.04		31.5.04	ספטמבר04	22.11.04			+	16*3.75 13*4.20 13*4.20 13*3.75	4	I	ד"ר שוחט			+
34	15.2.04		31.5.04	ספטמבר04	22.11.04			+	16*3.75 13*4.20 13*4.20 13*3.75	4	I	ד"ר שוחט			+
35	15.2.04		31.5.04	ספטמבר04	22.11.04			+	16*3.75 13*4.20 13*4.20 13*3.75	4	I	ד"ר שוחט			+
36	15.2.04		31.5.04	ספטמבר04	22.11.04			+	16*3.75 13*4.20 13*4.20 13*3.75	4	I	ד"ר שוחט			+
25	8.2.04		31.5.04	נובמבר04	22.11.04			+	16*3.75	1	I	ד"ר וולפסון			+
22	9.5.04	31.5.04		פברואר05											+
23	9.5.04	31.5.04		פברואר05											+
24	9.5.04	31.5.04		פברואר05											+
22	25.4.04		31.5.04	נובמבר04	13.12.04			+	16*3.30	1	I	ד"ר גבעול			+			13.12.04	בזמן החשיפה	31015	1
34	28.12.03		1.6.04	ספטמבר04	27.9.04			+	11*3.75 11*3.75 10*3.75 13*3.75	4	I	ד"ר בלינדר			+
35	28.12.03		1.6.04	ספטמבר04	27.9.04			+	11*3.75 11*3.75 10*3.75 13*3.75	4	I	ד"ר בלינדר			+
36	28.12.03		1.6.04	ספטמבר04	27.9.04			+	11*3.75 11*3.75 10*3.75 13*3.75	4	I	ד"ר בלינדר			+
37	28.12.03		1.6.04	ספטמבר04	27.9.04			+	11*3.75 11*3.75 10*3.75 13*3.75	4	I	ד"ר בלינדר			+
24	-		1.6.04	נובמבר04	29.11.04			+	16*3.75 10*4.20	2	I	ד"ר חלד			+
25	-		1.6.04	נובמבר04	29.11.04			+	16*3.75 10*4.20	2	I	ד"ר חלד			+
24	7.3.04		31.5.04	נובמבר04	1.12.04			+	13*3.30	1	I	ד"ר קרני		+
15	-		31.5.04	נובמבר04	25.8.04			+	13*3.75	1	I	ד"ר קרני		+				31.8.04	לאחר החשיפה (בזמן שיקום)	40156	1
46	15.2.04		31.5.04	ספטמבר04				+	13*3.75 13*3.75 13*3.75	3	I			+
47	15.2.04		31.5.04	ספטמבר04				+	13*3.75 13*3.75 13*3.75	3	I			+
48	15.2.04		31.5.04	ספטמבר04				+	13*3.75 13*3.75 13*3.75	3	I			+
25	-		31.5.04	נובמבר04				+	13*3.75	1	I			+
37	14.1.04		31.5.04	ספטמבר04	21.9.04			+	13*3.75 13*3.75	2	I	ד"ר קרני		+
36	14.1.04		31.5.04	ספטמבר04	21.9.04			+	13*3.75 13*3.75	2	I	ד"ר קרני		+
36	-		1.6.04	ספטמבר04				+	13*3.30 11*3.75 13*3.75	3	I			+				23.9.04	לפני החשיפה	40051	1
37	-		1.6.04	ספטמבר04				+	13*3.30 11*3.75 13*3.75	3	I			+
24	-		7.6.04	נובמבר04			+		13*3.75	1					+
14	18.1.04		7.6.04	נובמבר04				+	13*3.75	1	I				+
45	7.12.03		7.6.04	ספטמבר04	3.1.05			+	13*3.75	1	I	ד"ר גבעול			+
22	1.4.04		7.6.04	נובמבר04				+	16*3.75	1	I				+
42	15.3.04	7.6.04		פברואר05											+
43	15.3.04	7.6.04		פברואר05											+
16	7.3.04		7.6.04	נובמבר04	29.11.04			+	13*3.75 11*3.75	2	I	ד"ר חלד			+
17	7.3.04		7.6.04	נובמבר04	29.11.04			+	13*3.75 11*3.75	2	I	ד"ר חלד			+
35	-		7.6.04	ספטמבר04	27.9.04			+	10*3.75 10*3.75 10*3.75	3	I	ד"ר גבעול			+
36	-		7.6.04	ספטמבר04	27.9.04			+	10*3.75 10*3.75 10*3.75	3	I	ד"ר גבעול			+			27.6.04	לפני החשיפה	30756 30931	1
37	-		7.6.04	ספטמבר04	27.9.04			+	10*3.75 10*3.75 10*3.75	3	I	ד"ר גבעול			+			27.6.04	לפני החשיפה	30756 30931	1
46	16.5.04		7.6.04	ספטמבר04	22.11.04			+	13*3.75 13*3.75 13*3.75	3	I	ד"ר בראונשטיין			+
47	16.5.04		7.6.04	ספטמבר04	22.11.04			+	13*3.75 13*3.75 13*3.75	3	I	ד"ר בראונשטיין			+
24	7.3.04		7.6.04	נובמבר04				+	13*3.75	1	I				+
15	28.3.04		7.6.04	נובמבר04				+	13*3.75	1	I				+
25	9.5.04		7.6.04	נובמבר04				+	13*3.75	1	I				+
34	22.2.04		7.6.04	ספטמבר04	20.9.04			+	13*3.73 16*3.75 16*3.75 16*3.75	4	I	ד"ר בראונשטיין			+
35	22.2.04		7.6.04	ספטמבר04	20.9.04			+	13*3.73 16*3.75 16*3.75 16*3.75	4	I	ד"ר בראונשטיין			+
36	22.2.04		7.6.04	ספטמבר04	20.9.04			+	13*3.73 16*3.75 16*3.75 16*3.75	4	I	ד"ר בראונשטיין			+			20.9.04	בזמן החשיפה	40257	1
37	22.2.04		7.6.04	ספטמבר04	20.9.04			+	13*3.73 16*3.75 16*3.75 16*3.75	4	I	ד"ר בראונשטיין			+
14	13.5.04		8.6.04	נובמבר04				+	13*3.30	1	I			+
24	24.3.04		8.6.04	נובמבר04	10.11			+	11*4.20 13*3.75	2	I	ד"ר קרני		+
25	24.3.04		8.6.04	נובמבר04	10.11			+	11*4.20 13*3.75	2	I	ד"ר קרני		+
34	-		8.6.04	ספטמבר04	30.11.04			+	13*3.75 13*3.75 13*3.75	3	I	ד"ר קרני		+
35	-		8.6.04	ספטמבר04	30.11.04			+	13*3.75 13*3.75 13*3.75	3	I	ד"ר קרני		+
36	-		8.6.04	ספטמבר04	30.11.04			+	13*3.75 13*3.75 13*3.75	3	I	ד"ר קרני		+
13	26.2.04		9.6.04	נובמבר04				+	13*3.75	1	I			+
14	-	9.6.04	9.6.04	פברואר05				+	13*3.30	1	I			+
46	-		9.6.04	ספטמבר04	10.11.04			+	13*4.20	1	I	ד"ר קרני		+
46	21.12.03		14.6.04	אוקטובר04	13.12.04			+	13*3.75 11*3.75 13*3.75	3	I	ד"ר חלד			+
47	21.12.03		14.6.04	אוקטובר04	13.12.04			+	13*3.75 11*3.75 13*3.75	3	I	ד"ר חלד			+
41	7.9.03		14.6.04	דצמבר04	27.9.04			+	16*3.30	1	I	ד"ר ניצן			+
25	11.1.04		14.6.04	דצמבר04				+	16*3.75	1	I				+
24	8.2.04		14.6.04	דצמבר04	3.1.05		+		13*3.75 13*3.75 15*3.75 15*3.75	4		ד"ר בראונשטיין			+
25	8.2.04		14.6.04	דצמבר04	3.1.05		+		13*3.75 13*3.75 15*3.75 15*3.75	4		ד"ר בראונשטיין			+
26	8.2.04		14.6.04	דצמבר04	3.1.05		+		13*3.75 13*3.75 15*3.75 15*3.75	4		ד"ר בראונשטיין			+
27	8.2.04		14.6.04	דצמבר04	3.1.05		+		13*3.75 13*3.75 15*3.75 15*3.75	4		ד"ר בראונשטיין			+
24	30.5.04		14.6.04	דצמבר04				+	13*3.75 13*3.75 13*3.30 13*3.75	4	I				+
25	30.5.04		14.6.04	דצמבר04				+	13*3.75 13*3.75 13*3.30 13*3.75	4	I				+
26	30.5.04		14.6.04	דצמבר04				+	13*3.75 13*3.75 13*3.30 13*3.75	4	I				+
27	30.5.04		14.6.04	דצמבר04				+	13*3.75 13*3.75 13*3.30 13*3.75	4	I				+
24	-	14.6.04	14.6.04	מרץ05				+	13*3.75 11*37.5 13*3.75	3	I				+
25	-	14.6.04	14.6.04	מרץ05				+	13*3.75 11*37.5 13*3.75	3	I				+
26	-	14.6.04	14.6.04	מרץ05				+	13*3.75 11*37.5 13*3.75	3	I				+
26	-		14.6.04	דצמבר04			+		13*5.0	1					+
44	2.11.03		14.6.04	אוקטובר04	20.9.04			+	11*3.75 13*3.75 13*3.75 10*3.75	4	I	ד"ר גבעול			+
45	2.11.03		14.6.04	אוקטובר04	20.9.04			+	11*3.75 13*3.75 13*3.75 10*3.75	4	I	ד"ר גבעול			+
46	2.11.03		14.6.04	אוקטובר04	20.9.04			+	11*3.75 13*3.75 13*3.75 10*3.75	4	I	ד"ר גבעול			+
47	2.11.03		14.6.04	אוקטובר04	20.9.04			+	11*3.75 13*3.75 13*3.75 10*3.75	4	I	ד"ר גבעול			+
15	14.3.04		14.6.04	אוקטובר04				+	13*3.75	1	I				+			24.10.04	לפני החשיפה	40419	1
47	16.5.04		14.6.04	אוקטובר04	18.10.04			+	13*3.75 13*3.75 13*3.75	3	I	ד"ר שוחט			+
46	16.5.04		14.6.04	אוקטובר04	18.10.04			+	13*3.75 13*3.75 13*3.75	3	I	ד"ר שוחט			+
36	-		14.6.04	אוקטובר04	24.11.04			+	13*3.75 13*3.75	2	I	ד"ר קרני		+
37	-		14.6.04	אוקטובר04	24.11.04			+	13*3.75 13*3.75	2	I	ד"ר קרני		+
15	-		14.6.04	דצמבר04				+	13*3.30	1	I			+
31	2.12.03		14.6.04	אוקטובר04				+	13*3.30	1	I			+
26	29.2.04		21.6.04	אוקטובר+דצמבר04	29.11.04			+	13*3.30 13*4.20 13*3.75	3	I	ד"ר בראונשטיין			+
27	29.2.04		21.6.04	אוקטובר+דצמבר04	29.11.04			+	13*3.30 13*4.20 13*3.75	3	I	ד"ר בראונשטיין			+
34	29.2.04		21.6.04	אוקטובר+דצמבר04	29.11.04			+	13*3.30 13*4.20 13*3.75	3	I	ד"ר בראונשטיין			+
14	3.6.04		21.6.04	אוקטובר+דצמבר05				+	13*4.20*1 11*4.20 13*3.75	3	I				+
15	3.6.04		21.6.04	אוקטובר+דצמבר05				+	13*4.20*1 11*4.20 13*3.75	3	I				+
45	3.6.04		21.6.04	אוקטובר+דצמבר05				+	13*4.20*1 11*4.20 13*3.75	3	I				+
42	29.2.04		21.6.04	דצמבר04	25.10.04			+	13*3.30 13*3.30 13*3.30 16*3.30	4	I	ד"ר שושני			+
31	29.2.04		21.6.04	דצמבר04	25.10.04			+	13*3.30 13*3.30 13*3.30 16*3.30	4	I	ד"ר שושני			+
41	29.2.04		21.6.04	דצמבר04	25.10.04			+	13*3.30 13*3.30 13*3.30 16*3.30	4	I	ד"ר שושני			+			8.11.04	לאחר חשיפה (בזמן שיקום)	40051 40051	1
32	29.2.04		21.6.04	דצמבר04	25.10.04			+	13*3.30 13*3.30 13*3.30 16*3.30	4	I	ד"ר שושני			+			8.11.04	לאחר חשיפה (בזמן שיקום)	40051 40051	1
26	29.2.04		21.6.04	דצמבר04	13.12.04			+	13*4.20	1	I	ד"ר שושני			+
36	2.5.04		21.6.04	אוקטובר04	27.9.04			+	13*4.20	1	I	ד"ר בראונשטיין			+
35	2.5.04		21.6.04	אוקטובר04	18.10.04			+	10*3.75 10*3.75 10*3.75 11*3.75	4	I	ד"ר שושני			+
36	2.5.04		21.6.04	אוקטובר04	18.10.04			+	10*3.75 10*3.75 10*3.75 11*3.75	4	I	ד"ר שושני			+
37	2.5.04		21.6.04	אוקטובר04	18.10.04			+	10*3.75 10*3.75 10*3.75 11*3.75	4	I	ד"ר שושני			+
38	2.5.04		21.6.04	אוקטובר04	18.10.04			+	10*3.75 10*3.75 10*3.75 11*3.75	4	I	ד"ר שושני			+
13	2.5.04		21.6.04	דצמבר04				+	13*3.30 13*3.30	2	I				+
23	2.5.04		21.6.04	דצמבר04				+	13*3.30 13*3.30	2	I				+
12	-		21.6.04	דצמבר04	6.12.04			+	13*3.75	1	I	ד"ר שוחט			+
24	29.4.04		21.6.04	דצמבר04	27.12.04			+	13*4.20	1	I	ד"ר רון לב			+
46	-		22.6.04	אוקטובר04	2.11.04			+	13*3.75 13*3.75	2	I	ד"ר קרני		+
47	-		22.6.04	אוקטובר04	2.11.04			+	13*3.75 13*3.75	2	I	ד"ר קרני		+
14	14.3.04		22.6.04	דצמבר04				+	13*3.30	1	I			+
46	1.6.04		22.6.04	אוקטובר04				+	13*4.20	1	I			+
36	12.5.04		30.6.04	אוקטובר04	24.11.04			+	13*3.75 13*3.75	2	I	ד"ר קרני		+
24	24.5.04		30.6.04	דצמבר04	21.12.04			+	13*3.75	1	I	ד"ר קרני		+
11	-		30.6.04	דצמבר04	4.1.05			+	13*3.30	1	I	ד"ר קרני		+
14	-		30.6.04	דצמבר04	28.12.04			+	13*3.75 13*4.20	2	I	ד"ר קרני		+				28.12.04	בזמן החשיפה	40836	1
16	-		30.6.04	דצמבר04	28.12.04			+	13*3.75 13*4.20	2	I	ד"ר קרני		+
12	2.2.04		28.6.04	דצמבר04				+	16*3.75 16*3.75 16*3.75	3	I				+
21	2.2.04		28.6.04	דצמבר04				+	16*3.75 16*3.75 16*3.75	3	I				+
22	2.2.04		28.6.04	דצמבר04				+	16*3.75 16*3.75 16*3.75	3	I				+
35	8.2.04		28.6.04	אוקטובר04	29.11.04		+		13*3.75 13*3.75 13*5.0 11*5.0	4		ד"ר חלד			+
36	8.2.04		28.6.04	אוקטובר04	29.11.04		+		13*3.75 13*3.75 13*5.0 11*5.0	4		ד"ר חלד			+
37	8.2.04		28.6.04	אוקטובר04	29.11.04		+		13*3.75 13*3.75 13*5.0 11*5.0	4		ד"ר חלד			+
46	8.2.04		28.6.04	אוקטובר04	29.11.04		+		13*3.75 13*3.75 13*5.0 11*5.0	4		ד"ר חלד			+
22	7.3.04		28.6.04	דצמבר04	20.12.04			+	16*3.75	1	5MF	ד"ר רון לב			+
36	-		28.6.04	אוקטובר04				+	11*3.75 10*3.75	2	I				+
37	-		28.6.04	אוקטובר04				+	11*3.75 10*3.75	2	I				+
12	18.4.04		28.6.04	דצמבר04				+	13*3.30 13*3.30 13*3.30	3	I				+
24	18.4.04		28.6.04	דצמבר04				+	13*3.30 13*3.30 13*3.30	3	I				+
22	18.4.04		28.6.04	דצמבר04				+	13*3.30 13*3.30 13*3.30	3	I				+
14	8.2.04		28.6.04	דצמבר04	28.12.04			+	11*3.75 11*3.75	2	I	ד"ר שוחט			+
24	8.2.04		28.6.04	דצמבר04	28.12.04			+	11*3.75 11*3.75	2	I	ד"ר שוחט			+
14	3.3.04		28.6.04	דצמבר04	6.12.04			+	16*3.75	1	I	ד"ר בראונשטיין			+
15	-		28.6.04	דצמבר04				+	13*3.75	1	I				+
11	22.2.04		28.6.04	דצמבר04	22.11.04			+	16*4.20	1	5MF	ד"ר שוחט			+
22	2.2.04		28.6.04	דצמבר04	6.12.04			+	13*3.75 13*3.75 13*3.75 16*3.75	4	I	ד"ר ניצן			+			6.12.04	בזמן החשיפה	40834	1
11	2.2.04		28.6.04	דצמבר04	6.12.04			+	13*3.75 13*3.75 13*3.75 16*3.75	4	I	ד"ר ניצן			+
13	2.2.04		28.6.04	דצמבר04	6.12.04			+	13*3.75 13*3.75 13*3.75 16*3.75	4	I	ד"ר ניצן			+
23	2.2.04		28.6.04	דצמבר04	6.12.04			+	13*3.75 13*3.75 13*3.75 16*3.75	4	I	ד"ר ניצן			+
42	4.4.04	5.7.04		מרץ05											+
14	7.9.03		12.1.04	יולי04	5.7.04			+	13*3.75	1	I	ד"ר שושני			+
11	21.12.03		21.6.04	דצמבר04				+	13*3.75 13*.75	2	I			+
21	21.12.03		21.6.04	דצמבר04				+	13*3.75 13*.75	2	I			+
46	4.1.04		21.6.04	אוקטובר04	19.10.04			+	13*3.75 13*3.75	2	I	ד"ר קרני		+
47	4.1.04		21.6.04	אוקטובר04	19.10.04			+	13*3.75 13*3.75	2	I	ד"ר קרני		+
36	-		21.6.04	אוקטובר04				+	13*4.20	1	I			+
35	7.12.03		21.6.04	אוקטובר04	16.11.04			+	13*3.75 13*3.75 13*3.75	3	I	ד"ר קרני		+
36	7.12.03		21.6.04	אוקטובר04	16.11.04			+	13*3.75 13*3.75 13*3.75	3	I	ד"ר קרני		+
47	11.5.04		27.6.04	אוקטובר04				+	13*4.20	1	I			+
25	25.2.04		23.6.04	דצמבר04	3.1.05			+	13*3.75	1	I	ד"ר קרני		+
45	16.5.04		23.6.04	אוקטובר04	2.11.04			+	13*3.75	1	I	ד"ר קרני		+
35	4.2.04		23.6.04	אוקטובר04				+	13*3.75	1	I			+
46	-		5.7.04	אוקטובר04			+		13*3.75 13*3.75	2					+			2.8.04	לפני החשיפה		1
47	-		5.7.04	אוקטובר04			+		13*3.75 13*3.75	2					+			2.8.04	לפני החשיפה		1
46	22.3.04		5.7.04	אוקטובר04				+	10*3.30	1	I				+			24.8.04	לפני החשיפה	40865	1
15	28.12.03		5.7.04	דצמבר04	20.10.04			+	16*4.20 16*3.75	2	I	ד"ר שדה			+
25	28.12.03		5.7.04	דצמבר04	20.10.04			+	16*4.20 16*3.75	2	I	ד"ר שדה			+
21	7.3.04	5.7.04	5.7.04	מרץ05				+	16*3.30	1	I				+
25	7.3.04		5.7.04	דצמבר04	6.12.04			+	13*3.75	1	I	ד"ר שוחט			+
45	29.4.04		5.7.04	אוקטובר04	11.10.04			+	13*3.75	1	I	ד"ר שושני			+			11.10.04	בזמן החשיפה	40832	1
16	25.4.04		5.7.04	דצמבר04				+	13*4.20 13*4.20	2	I				+
16	25.4.04		5.7.04	דצמבר04				+	13*4.20 13*4.20	2	I				+
11	4.7.04		5.7.04	דצמבר04				+	16*3.75	1	I				+
12	28.3.04	5.7.04		מרץ05											+
13	-	5.7.04		מרץ05			+		13*3.75 15*3.75	2					+
14	-	5.7.04		מרץ05			+		13*3.75 15*3.75	2					+
21	-		6.7.04	דצמבר04	8.12.04		+		13*3.75	1	I	ד"ר קרני		+
44	31.5.04		6.7.04	אוקטובר04			+		10*3.75	1				+
35	7.3.04		6.7.04	אוקטובר04	29.11.04		+		13*3.75 13*3.75	2		ד"ר חלד		+
36	7.3.04		6.7.04	אוקטובר04	29.11.04		+		13*3.75 13*3.75	2		ד"ר חלד		+
36	7.1.04		7.7.04	אוקטובר04	27.10.04		+		13*5.0	1		ד"ר שדה		+
14	17.3.04		7.7.04	דצמבר04	8.12.04		+		13*3.75	1		ד"ר קרני		+
36	25.2.04		7.7.04	אוקטובר04			+		13*5.0 13*5.0	2				+
37	25.2.04		7.7.04	אוקטובר04			+		13*5.0 13*5.0	2				+
36	28.4.04		7.7.04	אוקטובר04	10.11.04		+		13*3.75 13*3.75 13*3.75	3		ד"ר קרני		+
37	28.4.04		7.7.04	אוקטובר04	10.11.04		+		13*3.75 13*3.75 13*3.75	3		ד"ר קרני		+
34	27.1.04		12.7.04	נובמבר04	11.10.04		+		13*3.75 13*3.75 13*3.75 13*5.0	4		ד"ר ניצן			+
35	27.1.04		12.7.04	נובמבר04	11.10.04		+		13*3.75 13*3.75 13*3.75 13*5.0	4		ד"ר ניצן			+
36	27.1.04		12.7.04	נובמבר04	11.10.04		+		13*3.75 13*3.75 13*3.75 13*5.0	4		ד"ר ניצן			+
34	27.1.04		12.7.04	נובמבר04	11.10.04		+		13*3.75 13*3.75 13*3.75 13*5.0	4		ד"ר ניצן			+
36	7.3.04		12.7.04	נובמבר04	6.12.04		+		13*3.75 11.5*3.75	2		ד"ר ניצן			+
37	7.3.04		12.7.04	נובמבר04	6.12.04		+		13*3.75 11.5*3.75	2		ד"ר ניצן			+
11	14.3.04	12.7.04		אפריל05											+
12	14.3.04	12.7.04		אפריל05											+
32	28.10.03		12.7.04	נובמבר04	20.12.04		+		13*3.75 13*3.75 13*3.75	3		ד"ר גבעול			+
42	28.10.03		12.7.04	נובמבר04	20.12.04		+		13*3.75 13*3.75 13*3.75	3		ד"ר גבעול			+
45	28.10.03		12.7.04	נובמבר04	20.12.04		+		13*3.75 13*3.75 13*3.75	3		ד"ר גבעול			+
35	7.3.04		12.7.04	נובמבר04	25.10.04		+		13*3.75 10*3.75 11.5*3.75	3		ד"ר שושני			+
36	7.3.04		12.7.04	נובמבר04	25.10.04		+		13*3.75 10*3.75 11.5*3.75	3		ד"ר שושני			+
37	7.3.04		12.7.04	נובמבר04	25.10.04		+		13*3.75 10*3.75 11.5*3.75	3		ד"ר שושני			+
15	20.6.04		12.7.04	ינואר05			+		11.5*3.75	1					+
31	23.5.04		12.7.04	ינואר05	15.11.04		+		13*3.75 13*3.75	2		ד"ר בראונשטיין			+
41	23.5.04		12.7.04	ינואר05	15.11.04		+		13*3.75 13*3.75	2		ד"ר בראונשטיין			+
46	14.3.04		12.7.04	נובמבר04	11.1		+		10*3.75 11.5*3.75 13*3.75	3		ד"ר שושני			+
47	14.3.04		12.7.04	נובמבר04	11.1		+		10*3.75 11.5*3.75 13*3.75	3		ד"ר שושני			+
22	29.4.04		12.7.04	ינואר05	27.12.04		+		13*3.75 13*3.75	2		ד"ר שוחט			+
23	29.4.04		12.7.04	ינואר05	27.12.04		+		13*3.75 13*3.75	2		ד"ר שוחט			+
14	2.5.04		12.7.04	ינואר05	13.12.04		+		13*3.75 11.5*3.75	2		ד"ר ברואנשטיין			+
15	2.5.04		12.7.04	ינואר05	13.12.04		+		13*3.75 11.5*3.75	2		ד"ר ברואנשטיין			+
13	-		12.7.04	ינואר05			+		13*3.75 13*3.75 13*3.75	3					+			18.7.04	לפני החשיפה	410864	1
14	-		12.7.04	ינואר05			+		13*3.75 13*3.75 13*3.75	3					+
15	-		12.7.04	ינואר05			+		13*3.75 13*3.75 13*3.75	3					+
14	15.2.04		13.7.04	ינואר05			+		11.5*3.75 13*3.75	2					+
	15.2.04		13.7.04	ינואר05			+		11.5*3.75 13*3.75	2					+
15	27.6.04		13.7.04	ינואר05			+		15*3.75 13*3.75	2					+
25	27.6.04		13.7.04	ינואר05			+		15*3.75 13*3.75	2					+
15	14.4.04		13.7.04	ינואר05	3.1.05		+		13*5.0 13*5.0	2		ד"ר קרני		+
16	14.4.04		13.7.04	ינואר05	3.1.05		+		13*5.0 13*5.0	2		ד"ר קרני		+
14	31.5.04		13.7.04	ינואר05			+		13*3.75	1				+
24	4.4.04		13.7.04	ינואר05			+		13*3.75	1				+
16	9.6.04		14.7.04	ינואר05			+		13*3.75 13*3.75	2				+
17	9.6.04		14.7.04	ינואר05			+		13*3.75 13*3.75	2				+
24	22.6.04		14.7.04	ינואר05			+		13*3.75 13*3.75	2				+
25	22.6.04		14.7.04	ינואר05			+		13*3.75 13*3.75	2				+
15	28.3.04		14.7.04	ינואר05			+		11.5*3.75	1				+
14	30.5.04		19.7.04	ינואר05	3.1.05		+		11.5*3.75 10*3.75	2		ד"ר יהלום			+
15	30.5.04		19.7.04	ינואר05	3.1.05		+		11.5*3.75 10*3.75	2		ד"ר יהלום			+
14	30.5.04		19.7.04	ינואר05	3.1.05		+		13*5.0 11.5*3.75	2		ד"ר בראונשטיין			+
15	30.5.04		19.7.04	ינואר05	3.1.05		+		13*5.0 11.5*3.75	2		ד"ר בראונשטיין			+		3.1.05		בזמן חשיפה	303038	1
22	-	19.7.04		אפריל05											+
23	-	19.7.04		אפריל05											+
22	15.7.04		19.7.04	ינואר05			+		15*3.75	1					+
34	13.5.04		19.7.04	נובמבר04	1.11.04		+		13*5.0 11.5*5.0 13*3.75 13*3.75	4		ד"ר חלד			+
35	13.5.04		19.7.04	נובמבר04	1.11.04		+		13*5.0 11.5*5.0 13*3.75 13*3.75	4		ד"ר חלד			+
36	13.5.04		19.7.04	נובמבר04	1.11.04		+		13*5.0 11.5*5.0 13*3.75 13*3.75	4		ד"ר חלד			+
37	13.5.04		19.7.04	נובמבר04	1.11.04		+		13*5.0 11.5*5.0 13*3.75 13*3.75	4		ד"ר חלד			+
35	14.3.04		19.7.04	נובמבר04	8.11.04		+		11.5*3.75 10*3.75	2		ד"ר שושני			+
36	14.3.04		19.7.04	נובמבר04	8.11.04		+		11.5*3.75 10*3.75	2		ד"ר שושני			+
12	15.2.04		19.7.04	ינואר05			+		15*3.75	1					+
14	8.2.04		19.7.04	ינואר05			+		13*3.75 11.5*3.75	2					+
15	8.2.04		19.7.04	ינואר05			+		13*3.75 11.5*3.75	2					+
45	-		19.7.04	נובמבר04			+		13*3.75 13*3.75 13*3.75	3					+
46	-		19.7.04	נובמבר04			+		13*3.75 13*3.75 13*3.75	3					+
47	-		19.7.04	נובמבר04			+		13*3.75 13*3.75 13*3.75	3					+
11	14.3.04		19.7.04	ינואר05			+		13*3.75 13*3.75 13*3.75 11.5*3.75	4					+
12	14.3.04		19.7.04	ינואר05			+		13*3.75 13*3.75 13*3.75 11.5*3.75	4					+
14	14.3.04		19.7.04	ינואר05			+		13*3.75 13*3.75 13*3.75 11.5*3.75	4					+
18	14.3.04		19.7.04	ינואר05			+		13*3.75 13*3.75 13*3.75 11.5*3.75	4					+
16	3.5.04		26.7.04	ינואר05			+		13*3.75 10*3.75	2					+
15	3.5.04		26.7.04	ינואר05			+		13*3.75 10*3.75	2					+
47	-		26.7.04	נובמבר04	19.12.04		+		11.5*5.0	1		ד"ר שדה			+
11	4.5.03	26.7.04		אפריל05											+
15	20.6.04		26.7.04	ינואר05			+		13*3.75	1					+
13	-		26.7.04	ינואר05	2.1.05		+		13*3.75	1		ד"ר שדה			+
43	-		26.7.04	נובמבר04	22.11.04		+		15*3.75 13*3.75	2		ד"ר ניצן			+
45	-		26.7.04	נובמבר04	22.11.04		+		15*3.75 13*3.75	2		ד"ר ניצן			+
16	3.6.04		26.7.04	ינואר05			+		10*5.0	1					+
34	-		26.7.04	נובמבר04			+		11.5*3.75	2					+
35	-		26.7.04	נובמבר04			+		11.5*3.75	2					+
13	3.5.04		26.7.04	ינואר05			+		13*5.0 13*5.0 10*5.0 11.5*3.75	4					+			1.11.04		43459	1
15	3.5.04		26.7.04	ינואר05			+		13*5.0 13*5.0 10*5.0 11.5*3.75	4					+
23	3.5.04		26.7.04	ינואר05			+		13*5.0 13*5.0 10*5.0 11.5*3.75	4					+
25	3.5.04		26.7.04	ינואר05			+		13*5.0 13*5.0 10*5.0 11.5*3.75	4					+
11	9.5.04		26.7.04	ינואר05			+		15*3.75	1					+
25	6.6.04		26.7.04	ינואר05		+			13*3.25	1					+
33	16.5.04		26.7.04	נובמבר04	1.11.04		+		13*3.75 13*3.75 13*3.75 13*3.75	4		ד"ר חלד			+
34	16.5.04		26.7.04	נובמבר04	1.11.04		+		13*3.75 13*3.75 13*3.75 13*3.75	4		ד"ר חלד			+
43	16.5.04		26.7.04	נובמבר04	1.11.04		+		13*3.75 13*3.75 13*3.75 13*3.75	4		ד"ר חלד			+
44	16.5.04		26.7.04	נובמבר04	1.11.04		+		13*3.75 13*3.75 13*3.75 13*3.75	4		ד"ר חלד			+
41	6.6.04		26.7.04	ינואר05	20.12.04	+			15*3.25	1		ד"ר גבעול			+
46	-		21.7.04	נובמבר04			+		11.5*3.75 13*3.75 13*3.75	3				+
47	-		21.7.04	נובמבר04			+		11.5*3.75 13*3.75 13*3.75	3				+
15	19.5.04		21.7.04	ינואר05			+		13*3.75	1				+
46	-		21.7.04	נובמבר04	16.11.04		+		13*3.75 13*3.75	2		ד"ר קרני		+
47	-		21.7.04	נובמבר04	16.11.04		+		13*3.75 13*3.75	2		ד"ר קרני		+
35	8.6.04		27.7.04	נובמבר04	10.11.04		+		13*3.75	1		ד"ר קרני		+
14	23.5.04		4.8.04	ינואר05			+		13*3.75	1				+
24	30.11.03		9.8.04	ינואר05			+		11.5*3.75 13*3.75	2					+
25	30.11.03		9.8.04	ינואר05			+		11.5*3.75 13*3.75	2					+
15	28.3.04		9.8.04	ינואר05		+			13*3.25	1					+
35	14.12.03		9.8.04	נובמבר04	20.12.04		+		13*3.75 11.5*3.75 11.5*5.0	3		ד"ר בראונשטיין			+
36	14.12.03		9.8.04	נובמבר04	20.12.04		+		13*3.75 11.5*3.75 11.5*5.0	3		ד"ר בראונשטיין			+
37	14.12.03		9.8.04	נובמבר04	20.12.04		+		13*3.75 11.5*3.75 11.5*5.0	3		ד"ר בראונשטיין			+
14	6.6.04	9.8.04	9.8.04	אפריל05			+		15*3.75	1					+
35	29.2.04		9.8.04	נובמבר04			+		11.5*3.75	1					+
36	28.3.04		9.8.04	נובמבר04	13.12.04		+		11.5*3.75 11.5*3.75 11.5*3.75	3		ד"ר חלד			+
37	28.3.04		9.8.04	נובמבר04	13.12.04		+		11.5*3.75 11.5*3.75 11.5*3.75	3		ד"ר חלד			+
38	28.3.04		9.8.04	נובמבר04	13.12.04		+		11.5*3.75 11.5*3.75 11.5*3.75	3		ד"ר חלד			+
11	21.3.04		9.8.04	ינואר05			+		13*3.75 13*3.75 11.5*3.75 11.5*3.75	4					+
12	21.3.04		9.8.04	ינואר05			+		13*3.75 13*3.75 11.5*3.75 11.5*3.75	4					+			4.10.04	לפני החשיפה	403458	1
21	21.3.04		9.8.04	ינואר05			+		13*3.75 13*3.75 11.5*3.75 11.5*3.75	4					+
22	21.3.04		9.8.04	ינואר05			+		13*3.75 13*3.75 11.5*3.75 11.5*3.75	4					+
25	9.5.04		9.8.04	ינואר05		+			13*3.25	1					+
26	4.4.04		9.8.04	ינואר05			+		10*3.75 11.5*3.75	2					+
27	4.4.04		9.8.04	ינואר05			+		10*3.75 11.5*3.75	2					+
36	10.3.04		9.8.04	נובמבר04			+		13*3.75 13*3.75	2					+
37	10.3.04		9.8.04	נובמבר04			+		13*3.75 13*3.75	2					+
44	-		9.8.04	נובמבר04	24.11.04	+			13*3.25	1		ד"ר קרני		+
46	-		11.8.04	נובמבר04			+		13*3.75 13*3.75 13*3.75	3				+
47	-		11.8.04	נובמבר04			+		13*3.75 13*3.75 13*3.75	3				+
14	25.3.04		11.8.04	ינואר05			+		13*3.75 13*3.75	2				+
15	25.3.04		11.8.04	ינואר05			+		13*3.75 13*3.75	2				+
36	28.3.04		16.8.04	דצמבר04			+		10*3.75 10*3.75	2					+
37	28.3.04		16.8.04	דצמבר04			+		10*3.75 10*3.75	2					+
25	28.3.04		16.8.04	פברואר05			+		13*3.75 15*3.75	2					+
26	28.3.04		16.8.04	פברואר05			+		13*3.75 15*3.75	2					+
25	18.7.04		16.8.04	פברואר05			+		13*3.75	1					+
33	-		16.8.04	דצמבר04	22.11.04		+		11.5*3.75 13*3.75 15*3.75	3		ד"ר ניצן			+
34	-		16.8.04	דצמבר04	22.11.04		+		11.5*3.75 13*3.75 15*3.75	3		ד"ר ניצן			+
36	-		16.8.04	דצמבר04	22.11.04		+		11.5*3.75 13*3.75 15*3.75	3		ד"ר ניצן			+
11	8.6.04		16.8.04	פברואר05			+		15*3.75	1					+
12	16.5.04	16.8.04	16.8.04	מאי05		+			13*3.25	1	F				+
35	19.5.04		16.8.04	דצמבר04			+		11.5*3.75 11.5*3.75 13*3.75	3					+
36	19.5.04		16.8.04	דצמבר04			+		11.5*3.75 11.5*3.75 13*3.75	3					+
37	19.5.04		16.8.04	דצמבר04			+		11.5*3.75 11.5*3.75 13*3.75	3					+
11	28.3.04		16.8.04	פברואר05			+		15*3.75 15*3.75 15*3.75 15*3.75	4					+
12	28.3.04		16.8.04	פברואר05			+		15*3.75 15*3.75 15*3.75 15*3.75	4					+
21	28.3.04		16.8.04	פברואר05			+		15*3.75 15*3.75 15*3.75 15*3.75	4					+
22	28.3.04		16.8.04	פברואר05			+		15*3.75 15*3.75 15*3.75 15*3.75	4					+
24	23.5.04		16.8.04	פברואר05			+		13*3.75 10*5.0	2					+
25	23.5.04		16.8.04	פברואר05			+		13*3.75 10*5.0	2					+
12	-	16.8.04	16.8.04	מאי05			+		15*3.75	1					+
35	28.10.04		16.8.04	דצמבר04	20.12.04		+		10*3.75 11.5*3.75 11.5*3.75	3		ד"ר גבעול			+			30.12.04	לאחר החשיפה (בזמן שיקום)	310766	1
36	28.10.04		16.8.04	דצמבר04	20.12.04		+		10*3.75 11.5*3.75 11.5*3.75	3		ד"ר גבעול			+
37	28.10.04		16.8.04	דצמבר04	20.12.04		+		10*3.75 11.5*3.75 11.5*3.75	3		ד"ר גבעול			+
24	-		16.8.04	פברואר05			+		15*3.75	1					+
26	4.4.04		23.8.04	מאי05			+		11.5*5.0 11.5*3.75	2					+
27	4.4.04		23.8.04	מאי05			+		11.5*5.0 11.5*3.75	2					+
45	4.4.04		23.8.04	דצמבר04			+		15*3.75	1					+
24	18.7.04		23.8.04	פברואר05			+		15*3.75	1					+
13	11.7.04	23.8.04	23.8.04	יוני05			+		11.5*3.75 11.5*3.75 13*3.75	3					+
12	11.7.04	23.8.04	23.8.04	יוני05			+		11.5*3.75 11.5*3.75 13*3.75	3					+
21	11.7.04	23.8.04	23.8.04	יוני05			+		11.5*3.75 11.5*3.75 13*3.75	3					+
22	25.4.04		23.8.04	פברואר05			+		11.5*3.75 15*3.75 13*3.75 13*3.75	4					+
24	25.4.04		23.8.04	פברואר05			+		11.5*3.75 15*3.75 13*3.75 13*3.75	4					+
25	25.4.04		23.8.04	פברואר05			+		11.5*3.75 15*3.75 13*3.75 13*3.75	4					+
26	25.4.04		23.8.04	פברואר05			+		11.5*3.75 15*3.75 13*3.75 13*3.75	4					+
36	-		23.8.04	דצמבר04	13.12.04		+		11.5*5.0	1		ד"ר גבעול			+
21	1.8.04		23.8.04	פברואר05			+		15*3.75	1					+
11	-		23.8.04	פברואר05			+		15*3.75 15*3.75 13*3.75 13*3.75	4					+
12	-		23.8.04	פברואר05			+		15*3.75 15*3.75 13*3.75 13*3.75	4					+
21	-		23.8.04	פברואר05			+		15*3.75 15*3.75 13*3.75 13*3.75	4					+
22	-		23.8.04	פברואר05			+		15*3.75 15*3.75 13*3.75 13*3.75	4					+
36	-		23.8.04	דצמבר04			+		13*3.75	1					+
36	11.7.04	23.8.04	23.8.04	מאי05			+		10*3.75 10*3.75 11.5*3.75	3					+
37	11.7.04	23.8.04	23.8.04	מאי05			+		10*3.75 10*3.75 11.5*3.75	3					+
36	9.3.03		23.8.04	דצמבר04			+		13*3.75 11.5*3.75 11.5*3.75	3					+
37	9.3.03		23.8.04	דצמבר04			+		13*3.75 11.5*3.75 11.5*3.75	3					+
13	12.5.04		23.8.04	פברואר05		+			13*3.25	1	F			+
25	21.3.04		25.8.04	פברואר05		+			13*3.25	1	F			+
15	6.6.04		30.8.04	פברואר05			+		13*3.75 10*3.75 11.5*3.75	3					+
16	6.6.04		30.8.04	פברואר05			+		13*3.75 10*3.75 11.5*3.75	3					+
17	6.6.04		30.8.04	פברואר05			+		13*3.75 10*3.75 11.5*3.75	3					+
12	29.9.04		30.8.04	פברואר05		+			15*3.25	1	F				+
35	-		30.8.04	דצמבר04	27.12.04		+		11.5*3.75	1		ד"ר רחימא			+
34	-		30.8.04	דצמבר04			+		13*3.75 13*3.75 13*3.75	3					+
35	-		30.8.04	דצמבר04			+		13*3.75 13*3.75 13*3.75	3					+
36	-		30.8.04	דצמבר04			+		13*3.75 13*3.75 13*3.75	3					+
41	-		30.8.04	פברואר05			+		13*3.75	1					+
45	-		30.8.04	דצמבר04	13.12.04		+		13*3.75 13*3.75	2		ד"ר בראונשטיין			+
46	-		30.8.04	דצמבר04	13.12.04		+		13*3.75 13*3.75	2		ד"ר בראונשטיין			+
26	18.4.04		30.8.04	פברואר05			+		13*3.75 13*3.75	2					+
27	18.4.04		30.8.04	פברואר05			+		13*3.75 13*3.75	2					+
35	-		30.8.04	דצמבר04	29.11.04		+		13*3.75	1		ד"ר גבעול			+
34	18.4.04		30.8.04	דצמבר04			+		10*3.75 10*3.75 13*3.75	3					+
35	18.4.04		30.8.04	דצמבר04			+		10*3.75 10*3.75 13*3.75	3					+				לאחר חשיפה		1
36	18.4.04		30.8.04	דצמבר04			+		10*3.75 10*3.75 13*3.75	3					+				לאחר חשיפה		1
44	16.5.04		30.8.04	דצמבר04	3.1.05		+		13*3.75 11.5*3.75	2		ד"ר בראונשטיין			+
45	16.5.04		30.8.04	דצמבר04	3.1.05		+		13*3.75 11.5*3.75	2		ד"ר בראונשטיין			+
46	23.8.04		6.9.04	דצמבר04			+		11.5*3.75 13*3.75 13*3.75	3					+
47	23.8.04		6.9.04	דצמבר04			+		11.5*3.75 13*3.75 13*3.75	3					+
46	21.3.04		6.9.04	דצמבר04			+		13*3.75 13*3.75	2					+
47	21.3.04		6.9.04	דצמבר04			+		13*3.75 13*3.75	2					+
11	28.3.04		6.9.04	פברואר05			+		15*3.75	1					+
46	11.7.04		6.9.04	דצמבר04			+		13*3.75	1					+
24	23.5.04		6.9.04	פברואר05			+		15*3.75	1					+
35	-	6.9.04	6.9.04	דצמבר04			+		13*3.75 13*3.75	2					+
36	-	6.9.04	6.9.04	דצמבר04			+		13*3.75 13*3.75	2					+
15	11.7.04		6.9.04	פברואר05			+		13*3.75	1					+
45	9.5.04		6.9.04	דצמבר04	28.12.04		+		13*3.75 13*3.75 13*3.75	3		ד"ר רחמיא			+
46	9.5.04		6.9.04	דצמבר04	28.12.04		+		13*3.75 13*3.75 13*3.75	3		ד"ר רחמיא			+
47	9.5.04		6.9.04	דצמבר04	28.12.04		+		13*3.75 13*3.75 13*3.75	3		ד"ר רחמיא			+
46	7.4.04		6.9.04	דצמבר04		+			13*3.25 13*3.25	2					+
34	16.5.04		6.9.04	דצמבר04	27.12.04		+		13*3.75 11.5*3.75	2		ד"ר שוחט			+
35	16.5.04		6.9.04	דצמבר04	27.12.04		+		13*3.75 11.5*3.75	2		ד"ר שוחט			+
21	10.6.04		13.9.04	מרץ05			+		15*3.75 15*3.75 15*3.75	3					+
22	10.6.04		13.9.04	מרץ05			+		15*3.75 15*3.75 15*3.75	3					+
46	23.12.04	13.9.04		יוני05											+
47	23.12.04	13.9.04		יוני05											+
21	18.4.04	13.9.04		יוני05											+
22	18.4.04	13.9.04		יוני05											+
14	16.5.04	13.9.04		מרץ05											+
15	16.5.04	13.9.04		מרץ05											+
16	16.5.04	13.9.04		מרץ05											+
35	2.5.04		13.9.04	ינואר05	13.12.04		+		10*3.75 11.5*3.75 11.5*3.75	3		ד"ר ברואנשטיין			+
36	2.5.04		13.9.04	ינואר05	13.12.04		+		10*3.75 11.5*3.75 11.5*3.75	3		ד"ר ברואנשטיין			+
37	2.5.04		13.9.04	ינואר05	13.12.04		+		10*3.75 11.5*3.75 11.5*3.75	3		ד"ר ברואנשטיין			+
42	14.3.04		13.9.04	ינואר05		+			13*3.25 15*3.25	2					+
32	14.3.04		13.9.04	ינואר05		+			13*3.25 15*3.25	2					+
14	7.7.04		20.9.04	מרץ05			+		13*3.75 13*3.75	2					+
24	7.7.04		20.9.04	מרץ05			+		13*3.75 13*3.75	2					+
37	7.7.04		20.9.04	ינואר05			+		11.5*3.75	1					+
32	1.4.04		20.9.04	ינואר05		+			15*3.25 15*3.25	2	F				+
41	1.4.04		20.9.04	ינואר05		+			15*3.25 15*3.25	2	F				+
21	31.5.04		20.9.04	מרץ05			+		15*3.75	1					+
14	23.5.04		20.9.04	מרץ05			+		13*3.75 13*3.75 13*3.75	3					+
15	23.5.04		20.9.04	מרץ05			+		13*3.75 13*3.75 13*3.75	3					+
16	23.5.04		20.9.04	מרץ05			+		13*3.75 13*3.75 13*3.75	3					+
21	26.10.03		20.9.04	מרץ05			+		13*3.75	1					+
15	14.6.04		20.9.04	מרץ05			+		10*3.75	1					+
35	23.5.04		20.9.04	ינואר05			+		13*3.75 13*3.75 13*3.75 13*3.75	4					+
36	23.5.04		20.9.04	ינואר05			+		13*3.75 13*3.75 13*3.75 13*3.75	4					+
37	23.5.04		20.9.04	ינואר05			+		13*3.75 13*3.75 13*3.75 13*3.75	4					+
13	-		20.9.04	מרץ05			+		13*3.75	1					+			12.10.04	לפני החשיפה	405157	1
14	2.5.04		20.9.04	מרץ05			+		13*3.75	1					+
36	20.5.04		20.9.04	ינואר05			+		11.5*5.0	1					+
26	-		20.9.04	מרץ05			+		11.5*3.75	1					+
32	23.5.04		20.9.04	ינואר05			+		13*3.75 13*3.75	2					+
42	23.5.04		20.9.04	ינואר05			+		13*3.75 13*3.75	2					+
46	30.5.04		20.9.04	ינואר05	20.12.04		+		10*3.75 11.5*3.75	2		ד"ר יהלום			+
47	30.5.04		20.9.04	ינואר05	20.12.04		+		10*3.75 11.5*3.75	2		ד"ר יהלום			+
46	30.5.04		27.9.04	ינואר05			+		11.5*3.75 11.5*3.75 11.5*3.75	3					+
47	30.5.04		27.9.04	ינואר05			+		11.5*3.75 11.5*3.75 11.5*3.75	3					+
11	6.6.04		27.9.04	מרץ05		+			11.5*3.25 11.5*3.25	2					+
21	6.6.04		27.9.04	מרץ05		+			11.5*3.25 11.5*3.25	2					+
47	3.6.04		27.9.04	ינואר05			+		11.5*5.0	1					+			24.10.04	לפני החשיפה	402762	1
36	31.5.04		27.9.04	ינואר05			+		11.5*3.75 13*3.75	2					+
37	31.5.04		27.9.04	ינואר05			+		11.5*3.75 13*3.75	2					+
25	3.6.04		27.9.04	מרץ05			+		13*3.75	1					+
21	31.5.04	27.9.04		מאי05											+
22	31.5.04	27.9.04		מאי05											+
35	20.6.04		27.9.04	ינואר04			+		10*3.75 11.5*3.75	2		ד"ר שוחט			+
36	20.6.04		27.9.04	ינואר04			+		10*3.75 11.5*3.75	2		ד"ר שוחט			+
13	20.6.04		27.9.04	מרץ05			+		13*3.75	1					+
44	14.9.04		27.9.04	ינואר05	27.12.04	+			13*3.25 11.5*3.25	2		ד"ר רחימא			+
45	14.9.04		27.9.04	ינואר05	27.12.04	+			13*3.25 11.5*3.25	2		ד"ר רחימא			+			27.12.04	בזמן החשיפה	249935	1
32	6.6.04		27.9.04	ינואר05			+		15*3.75 15*3.75	2					+
42	6.6.04		27.9.04	ינואר05			+		15*3.75 15*3.75	2					+
14	7.6.04		27.9.04	מרץ05			+		15*3.75	1					+
31	7.6.04	4.10.04		יוני05											+
44	22.8.04		4.10.04	ינואר05		+			13*3.25 13*3.25	2					+			25.10.04		249936	1
45	22.8.04		4.10.04	ינואר05		+			13*3.25 13*3.25	2					+
14	30.5.04		4.10.04	מרץ05		+			13*3.25	1					+
22	21.3.04	4.10.04	4.10.04	יוני05		+			13*3.25	1					+
21	-	4.10.04	4.10.04	מרץ05			+		15*3.75	1					+
24	-		5.10.04	מרץ05		+			13*3.25	1					+
25	-		5.10.04	מרץ05			+		10*3.75 11.5*3.75	2					+
26	-		5.10.04	מרץ05			+		10*3.75 11.5*3.75	2					+
34	8.8.04		5.10.04	ינואר05		+			11.5*3.25 13*3.25	2					+
36	-		5.10.04	ינואר05			+		13*3.75	1					+
12	16.5.04	11.10.04	11.10.04	יוני05			+		13*3.75 13*3.75 15*3.75 15*3.75	4					+
13	16.5.04	11.10.04	11.10.04	יוני05			+		13*3.75 13*3.75 15*3.75 15*3.75	4					+
21	16.5.04	11.10.04	11.10.04	יוני05			+		13*3.75 13*3.75 15*3.75 15*3.75	4					+
22	16.5.04	11.10.04	11.10.04	יוני05			+		13*3.75 13*3.75 15*3.75 15*3.75	4					+
31	28.3.04	11.10.04		יוני05											+
32	28.3.04	11.10.04		יוני05											+
32	-		11.10.04	פברואר05		+			13*3.25 15*3.25	2					+			30.11.04	לפני חשיפה	244873	1
42	-		11.10.04	פברואר05		+			13*3.25 15*3.25	2					+
35	6.6.04		11.10.04	פברואר05			+		11.5*3.75 11.5*3.75	2					+
36	6.6.04		11.10.04	פברואר05			+		11.5*3.75 11.5*3.75	2					+
11	6.6.04		11.10.04	אפריל05			+		15*3.75	1					+
21	23.5.04	11.10.04		יוני05											+
45	-		11.10.04	פברואר05			+		13*3.75	1					+
25	8.8.04		17.10.04	אפריל05			+		11.5*3.75	1				+
45	11.7.04		17.10.04	פברואר05			+		13*3.75	1				+
44	25.7.04		17.10.04	פברואר05			+		13*3.75	1				+
46	4.7.04		17.10.04	פברואר05			+		13*3.75 13*3.75	2				+
47	4.7.04		17.10.04	פברואר05			+		13*3.75 13*3.75	2				+
11	12.10.03	18.10.04	18.10.04	יוני05		+			15*3.25 15*3.25 15*3.25	1					+
21	12.10.03	18.10.04	18.10.04	יוני05		+			15*3.25 15*3.25 15*3.25	1					+
22	12.10.03	18.10.04	18.10.04	יוני05		+			15*3.25 15*3.25 15*3.25	1					+
45	13.6.04		18.10.04	פברואר05		+			13*3.25	1					+
14	25.7.04		18.10.04	אפריל05			+		13*3.75	1					+
34	28.12.04		18.10.04	פברואר05			+		13*3.75	1					+
36	20.6.04		18.10.04	פברואר05			+		13*3.75 10*3.75 11.5*3.75	3					+
37	20.6.04		18.10.04	פברואר05			+		13*3.75 10*3.75 11.5*3.75	3					+
38	20.6.04		18.10.04	פברואר05			+		13*3.75 10*3.75 11.5*3.75	3					+
21	11.7.04	18.10.04	18.10.04	יוני05		+			15*3.25	1					+
11	27.6.04		18.10.04	אפריל05			+		13*3.75 13*3.75	2					+
21	27.6.04		18.10.04	אפריל05			+		13*3.75 13*3.75	2					+
45	25.7.04		18.10.04	פברואר05			+		13*3.75 11.5*5.0 11.5*3.75	3					+
46	25.7.04		18.10.04	פברואר05			+		13*3.75 11.5*5.0 11.5*3.75	3					+
47	25.7.04		18.10.04	פברואר05			+		13*3.75 11.5*5.0 11.5*3.75	3					+
24	-		19.10.04	אפריל05			+		13*3.75 13*3.75	2				+
25	-		19.10.04	אפריל05			+		13*3.75 13*3.75	2				+
42	-		19.10.04	פברואר05		+			13*3.25	1				+
15	20.6.04		25.10.04	אפריל05			+		13*3.75 13*3.75 15*3.75	3					+			15.11.04	לפני החשיפה	450260	1
14	20.6.04		25.10.04	אפריל05			+		13*3.75 13*3.75 15*3.75	3					+
16	20.6.04		25.10.04	אפריל05			+		13*3.75 13*3.75 15*3.75	3					+
24	4.7.04	25.10.04	25.10.04	יוני05			+		15*3.75	1					+
14	4.7.05		25.10.04	אפריל05		+			13*3.25	1	IOSM				+
11	18.8.03		25.10.04	אפריל05			+		13*3.75 13*3.75 13*3.75 13*3.75	4					+
12	18.8.03		25.10.04	אפריל05			+		13*3.75 13*3.75 13*3.75 13*3.75	4					+
13	18.8.03		25.10.04	אפריל05			+		13*3.75 13*3.75 13*3.75 13*3.75	4					+
14	18.8.03		25.10.04	אפריל05			+		13*3.75 13*3.75 13*3.75 13*3.75	4					+
35	20.6.04		25.10.04	פברואר05			+		13*3.75 11.5*3.75 11.5*3.75	3					+
36	20.6.04		25.10.04	פברואר05			+		13*3.75 11.5*3.75 11.5*3.75	3					+
37	20.6.04		25.10.04	פברואר05			+		13*3.75 11.5*3.75 11.5*3.75	3					+
33	29.8.04		25.10.04	פברואר05			+		13*3.75	1					+
15	-		25.10.04	אפריל05			+		13*3.75	1					+
44	22.8.04	25.10.04	25.10.04	יוני05			+		15*3.75	1					+
42	20.6.04		25.10.04	פברואר05		+			15*3.25 15*3.25	2					+
32	20.6.04		25.10.04	פברואר05		+			15*3.25 15*3.25	2					+
37	17.10.04		25.10.04	פברואר05			+		13*3.75 10*3.75 11.5*3.75	3					+
36	17.10.04		25.10.04	פברואר05			+		13*3.75 10*3.75 11.5*3.75	3					+
38	17.10.04		25.10.04	פברואר05			+		13*3.75 10*3.75 11.5*3.75	3					+
25	26.9.04		1.11.04	אפריל05			+		13*3.75	1				+
14	4.7.04		1.11.04	אפריל05			+		13*3.75 13*3.75 10*3.75	3					+
15	4.7.04		1.11.04	אפריל05			+		13*3.75 13*3.75 10*3.75	3					+
23	4.7.04		1.11.04	אפריל05			+		13*3.75 13*3.75 10*3.75	3					+
31	4.3.04	1.11.04	1.11.04	יולי05		+			13*3.25	1	IOSM				+
44	25.7.04		1.11.04	פברואר05		+			13*3.25	1	IOSM				+
43	25.7.04		1.11.04	פברואר05		+			13*3.25	1	IOSM				+
15	5.7.04		1.11.04	אפריל05			+		13*3.75	1					+
46	11.7.04		1.11.04	פברואר05			+		13*3.75 11.5*3.75	2					+
47	11.7.04		1.11.04	פברואר05			+		13*3.75 11.5*3.75	2					+
14	10.2.04		1.11.04	אפריל05			+		13*3.75 13*3.75 13*3.75	3					+
15	10.2.04		1.11.04	אפריל05			+		13*3.75 13*3.75 13*3.75	3					+
16	10.2.04		1.11.04	אפריל05			+		13*3.75 13*3.75 13*3.75	3					+
33	-		1.11.04	פברואר05			+		15*3.75 13*3.75	2					+
43	-		1.11.04	פברואר05			+		15*3.75 13*3.75	2					+
11	24.10.04		1.11.04	אפריל05		+			13*3.25 15*3.25	2					+
12	24.10.04		1.11.04	אפריל05		+			13*3.25 15*3.25	2					+
46	6.6.04		2.11.04	פברואר05			+		13*3.75 13*3.75 13*3.75	3				+
47	6.6.04		2.11.04	פברואר05			+		13*3.75 13*3.75 13*3.75	3				+
48	6.6.04		2.11.04	פברואר05			+		13*3.75 13*3.75 13*3.75	3				+
12	20.6.04	8.11.04	8.11.04	יוני05			+		15*3.75	1					+
37	-		8.11.04	פברואר05			+		11.5*5.0	1					+
21	25.7.04	8.11.04		יוני05											+
22	25.7.04	8.11.04		יוני05											+
25	-		8.11.04	אפריל05			+		11.5*3.75	1					+
21	17.3.04	8.11.04	8.11.04	יוני05		+			15*3.25 15*3.25	2					+
11	17.3.04	8.11.04	8.11.04	יוני05		+			15*3.25 15*3.25	2					+
14	18.7.04		8.11.04	אפריל05			+		15*3.75	1					+
36	18.7.04		8.11.04	פברואר05			+		11.5*3.75	1					+
44	18.7.04	8.11.04	8.11.04	יוני05			+		13*3.75 13*3.75 11.5*3.75 11.5*3.75	4					+
45	18.7.04	8.11.04	8.11.04	יוני05			+		13*3.75 13*3.75 11.5*3.75 11.5*3.75	4					+
46	18.7.04	8.11.04	8.11.04	יוני05			+		13*3.75 13*3.75 11.5*3.75 11.5*3.75	4					+
47	18.7.04	8.11.04	8.11.04	יוני05			+		13*3.75 13*3.75 11.5*3.75 11.5*3.75	4					+
22	-		8.11.04	אפריל05			+		15*3.75	1					+
15	8.8.04		10.11.04	אפריל05			+		13*3.75	1				+
46	2.11.04		10.11.04	פברואר05			+		13*5.0	1				+
46	8.8.04		15.11.04	מרץ05			+		11.5*3.75 10*3.75 10*3.75	3					+
47	8.8.04		15.11.04	מרץ05			+		11.5*3.75 10*3.75 10*3.75	3					+
13	-		15.11.04	מאי05			+		13*3.75 13*3.75	2					+
23	-		15.11.04	מאי05			+		13*3.75 13*3.75	2					+
14	8.8.04	15.11.04	15.11.04	אוגוסט05			+		10*3.75 10*3.75 10*5.0	3					+
15	8.8.04	15.11.04	15.11.04	אוגוסט05			+		10*3.75 10*3.75 10*5.0	3					+
17	8.8.04	15.11.04	15.11.04	אוגוסט05			+		10*3.75 10*3.75 10*5.0	3					+
14	8.8.04		15.11.04	מאי05			+		15*3.75 10*3.75	2					+
15	8.8.04		15.11.04	מאי05			+		15*3.75 10*3.75	2					+
46	25.4.04		15.11.04	מרץ05			+		11.5*5.0 10*5.0	2					+
47	25.4.04		15.11.04	מרץ05			+		11.5*5.0 10*5.0	2					+
13	1.8.04	15.11.04	15.11.04	אוגוסט05		+			13*3.25 13*3.25	2					+
23	1.8.04	15.11.04	15.11.04	אוגוסט05		+			13*3.25 13*3.25	2					+
36	13.6.04		15.11.04	מרץ05			+		11.5*5.0 11.5*5.0 10*5.0	3					+
37	13.6.04		15.11.04	מרץ05			+		11.5*5.0 11.5*5.0 10*5.0	3					+
38	13.6.04		15.11.04	מרץ05			+		11.5*5.0 11.5*5.0 10*5.0	3					+
24	25.7.04		15.11.04	מאי05		+			13*3.25 15*3.25	2					+
25	25.7.04		15.11.04	מאי05		+			13*3.25 15*3.25	2					+
11	9.11.04		15.11.04	מאי05			+		13*3.75 11.5*3.75	8					+
13	9.11.04		15.11.04	מאי05			+		13*3.75 11.5*3.75	8					+
14	9.11.04		15.11.04	מאי05			+		13*3.75 11.5*3.75	8					+
16	9.11.04		15.11.04	מאי05			+		13*3.75 11.5*3.75	8					+
21	9.11.04		15.11.04	מאי05			+		13*3.75 11.5*3.75	8					+
23	9.11.04		15.11.04	מאי05			+		13*3.75 11.5*3.75	8					+
24	9.11.04		15.11.04	מאי05			+		13*3.75 11.5*3.75	8					+
26	9.11.04		15.11.04	מאי05			+		13*3.75 11.5*3.75	8					+
45	15.8.04		15.11.04	מרץ05			+		13*3.75 13*3.75	2					+
46	15.8.04		15.11.04	מרץ05			+		13*3.75 13*3.75	2					+
41	25.3.04		16.11.04	מאי05		+			13*3.25	1				+
15	27.6.04		16.11.04	מאי05			+		13*3.75 13*3.75	2				+
16	27.6.04		16.11.04	מאי05			+		13*3.75 13*3.75	2				+
45	2.11.04		17.11.04	מרץ05			+		13*3.75 13*3.75	2				+
36	27.6.04		17.11.04	מרץ05			+		13*5.0	1				+
15	19.4.04		22.11.04	מאי05			+		13*3.75	1					+
11	12.9.04		22.11.04	מאי05			+		13*3.75	1					+
24	11.7.04		22.11.04	מאי05		+			13*4.0	1					+
15	25.7.04		22.11.04	מאי05			+		13*3.75	1					+
36	22.2.04		22.11.04	מרץ05			+		10*3.75 11.5*3.75 13*3.75	3					+
37	22.2.04		22.11.04	מרץ05			+		10*3.75 11.5*3.75 13*3.75	3					+
38	22.2.04		22.11.04	מרץ05			+		10*3.75 11.5*3.75 13*3.75	3					+
12	25.7.04	22.11.04	22.11.04	אוגוסט05		+			15*3.25	1					+
14	25.7.04	22.11.04	22.11.04	אוגוסט05		+			13*3.25	1					+
35	16.5.04		22.11.04	מרץ05			+		13*3.75 13*3.75 13*5.0	3					+
36	16.5.04		22.11.04	מרץ05			+		13*3.75 13*3.75 13*5.0	3					+
45	16.5.04		22.11.04	מרץ05			+		13*3.75 13*3.75 13*5.0	3					+
14	-		22.11.04	מאי05			+		13*3.25	1					+
14	19.5.04		22.11.04	מאי05			+		13*3.75 13*3.75	2					+
15	19.5.04		22.11.04	מאי05			+		13*3.75 13*3.75	2					+
46	25.7.04		22.11.04	מרץ05			+		13*3.75	1					+
24	25.7.04		22.11.04	מאי05			+		13*3.75	1					+
32	12.11.03		22.11.04	מרץ05		+			15*3.25 15*3.25	2					+
42	12.11.03		22.11.04	מרץ05		+			15*3.25 15*3.25	2					+
37	1.8.04		22.11.04	מרץ05			+		11.5*3.75	1					+
14	-		22.11.04	מאי05			+		13*3.75 13*3.75	2					+
14,24	-		22.11.04	מאי05			+		13*3.75 13*3.75	2					+
12	22.8.04		22.11.04	מאי05			+		13*3.75	1					+
14	1.8.04	22.11.04	22.11.04	אוגוסט05											+
14	16.12.04		24.11.04	מאי05			+		13*3.75	1				+
44	25.7.04		29.11.04	מרץ05			+		13*3.75 10*5.0 10*5.0 11.5*3.75	4					+
45	25.7.04		29.11.04	מרץ05			+		13*3.75 10*5.0 10*5.0 11.5*3.75	4					+
46	25.7.04		29.11.04	מרץ05			+		13*3.75 10*5.0 10*5.0 11.5*3.75	4					+
47	25.7.04		29.11.04	מרץ05			+		13*3.75 10*5.0 10*5.0 11.5*3.75	4					+
13	31.10.04		29.11.04	מאי05		+			13*3.25 15*3.25	2					+
12	31.10.04		29.11.04	מאי05		+			13*3.25 15*3.25	2					+
23	-		29.11.04	מאי05			+		13*3.75 11.5*3.75	2					+
14	-		29.11.04	מאי05			+		13*3.75 11.5*3.75	2					+
23	7.11.04		29.11.04	מאי05			+		15*3.75	1					+
11	-		29.11.04	מאי05			+		13*3.75 13*3.75 13*3.75	3					+
21	-		29.11.04	מאי05			+		13*3.75 13*3.75 13*3.75	3					+
22	-		29.11.04	מאי05			+		13*3.75 13*3.75 13*3.75	3					+
24	8.8.04		29.11.04	מאי05		+			15*3.25 15*3.25	2					+
14	8.8.04		29.11.04	מאי05		+			15*3.25 15*3.25	2					+
44	-		29.11.04	מרץ05		+			13*3.25 13*3.25 13*4.0 13*4.0	4					+
45	-		29.11.04	מרץ05		+			13*3.25 13*3.25 13*4.0 13*4.0	4					+
46	-		29.11.04	מרץ05		+			13*3.25 13*3.25 13*4.0 13*4.0	4					+
47	-		29.11.04	מרץ05		+			13*3.25 13*3.25 13*4.0 13*4.0	4					+
44	20.7.03		29.11.04	מרץ05		+			11.5*3.25	1					+
45	-	29.11.04	29.11.04	אוגוסט05		+			11.5*32.5 11.5*3.25	2					+
46	-	29.11.04	29.11.04	אוגוסט05		+			11.5*32.5 11.5*3.25	2					+
47	-	29.11.04	29.11.04	אוגוסט05		+			11.5*32.5 11.5*3.25	2					+
15	18.7.04		29.11.04	מאי05			+		11.5*3.75	1					+
14	10.10.04		30.11.04	מאי05		+			13*3.25	1				+
35	2.9.04		30.11.04	מרץ05			+		13*3.75	1				+
24	10.10.04		1.12.04	מאי05			+		13*3.75	1				+
14	18.7.04		1.12.04	מאי05			+		13*3.75 13*3.75 13*3.75	3				+
15	18.7.04		1.12.04	מאי05			+		13*3.75 13*3.75 13*3.75	3				+
16	18.7.04		1.12.04	מאי05			+		13*3.75 13*3.75 13*3.75	3				+
15	-		1.12.04	מאי05		+			13*3.25	1				+
35	22.8.04		6.12.04	מרץ05		+			11.5*3.25 11.5*3.25	1					+
36	22.8.04		6.12.04	מרץ05		+			11.5*3.25 11.5*3.25	1					+
45	5.9.04		6.12.04	מרץ05			+		11.5*3.75 11.5*3.75 11.5*3.75	3					+
46	5.9.04		6.12.04	מרץ05			+		11.5*3.75 11.5*3.75 11.5*3.75	3					+
47	5.9.04		6.12.04	מרץ05			+		11.5*3.75 11.5*3.75 11.5*3.75	3					+
35	8.8.04		6.12.04	מרץ05		+			11.5*4.0	1					+
25	8.8.04		6.12.04	מאי05		+			11.5*4.0	1					+
11	24.10.04		6.12.04	מאי05		+			15*4.0 13*3.25 13*3.25	3					+
21	24.10.04		6.12.04	מאי05		+			15*4.0 13*3.25 13*3.25	3					+
22	24.10.04		6.12.04	מאי05		+			15*4.0 13*3.25 13*3.25	3					+
35	8.8.04		6.12.04	מרץ05		+			11.5*3.25 11.5*3.25 11.5*3.25	3					+
36	8.8.04		6.12.04	מרץ05		+			11.5*3.25 11.5*3.25 11.5*3.25	3					+
37	8.8.04		6.12.04	מרץ05		+			11.5*3.25 11.5*3.25 11.5*3.25	3					+
36	8.8.04		6.12.04	מרץ05			+		10*3.75 10*3.75 11.5*3.75	3					+
37	8.8.04		6.12.04	מרץ05			+		10*3.75 10*3.75 11.5*3.75	3					+
35	8.8.04		6.12.04	מרץ05			+		13*3.75	1					+
14	15.8.04	6.12.04	6.12.04	אוגוסט05			+		13*3.75	1					+
24	14.11.04		6.12.04	מאי05			+		13*3.75	1					+
34	15.8.04		6.12.04	מרץ05			+		15*3.75	1					+
24	24.10.04		6.12.04	מאי05		+			13*3.25 13*4.0	2					+
26	24.10.04		6.12.04	מאי05		+			13*3.25 13*4.0	2					+
24	29.8.04		6.12.04	מאי05			+		11.5*3.75	1				+
14	30.6.04		7.12.04	מאי05			+		13*3.75	1				+
15	17.11.04		7.12.04	מאי05		+			13*3.25	1				+
15	4.7.04		7.12.04	מאי05			+		13*3.75	1				+
24	18.7.04		7.12.04	מאי05		+			13*3.25	1				+
25	18.7.04		7.12.04	מאי05			+		13*3.75 13*3.75	2				+
26	18.7.04		7.12.04	מאי05			+		13*3.75 13*3.75	2				+
45	1.12.04		8.12.04	מרץ05			+		13*3.75 13*3.75	2				+
46	1.12.04		8.12.04	מרץ05			+		13*3.75 13*3.75	2				+
14	30.11.04		8.12.04	מאי05		+			13*3.25	1				+
23	6.6.04	13.12.04	13.12.04	ספטמבר05		+			15*3.25	1					+
33	-		13.12.04	יוני05			+		13*3.75 13*3.75	2					+
43	-		13.12.04	יוני05			+		13*3.75 13*3.75	2					+
14	15.8.04		13.12.04	יוני05			+		15*3.75	1					+
14	15.8.04		13.12.04	יוני05			+		15*3.75	1					+
47	-		13.12.04	אפריל05			+		13*3.75	1					+
45	24.8.04	13.12.04	13.12.04	ספטמבר05			+		11.5*3.75 11.5*3.75 10*3.75	3					+
46	24.8.04	13.12.04	13.12.04	ספטמבר05			+		11.5*3.75 11.5*3.75 10*3.75	3					+
47	24.8.04	13.12.04	13.12.04	ספטמבר05			+		11.5*3.75 11.5*3.75 10*3.75	3					+
45	-		13.12.04	אפריל05			+		10*3.75 10*3.75 10*3.75	3					+
46	-		13.12.04	אפריל05			+		10*3.75 10*3.75 10*3.75	3					+
47	-		13.12.04	אפריל05			+		10*3.75 10*3.75 10*3.75	3					+
13	15.8.04		13.12.04	יוני05			+		13*3.75	1					+
44	15.8.04		13.12.04	אפריל05			+		13*3.75	1					+
21	15.8.04	13.12.04		ספטמבר05											+
11	15.8.04		13.12.04	יוני05			+		13*3.75	1				+
24	25.4.04		13.12.04	יוני05			+		10*3.75	1				+
11	12.9.04	13.12.04	13.12.04	ספטמבר05			+		15*3.75	1				+
44	18.7.04		13.12.04	אפריל05			+		11.5*3.75 11.5*3.75 13*3.75	3				+
45	18.7.04		13.12.04	אפריל05			+		11.5*3.75 11.5*3.75 13*3.75	3				+
46	18.7.04		13.12.04	אפריל05			+		11.5*3.75 11.5*3.75 13*3.75	3				+			5.1.05		לפני החשיפה	407420	1
45	25.8.04		20.12.04	אפריל05			+		13*3.75 13*3.75	2					+
46	25.8.04		20.12.04	אפריל05			+		13*3.75 13*3.75	2					+
14	22.8.04		20.12.04	יוני05			+		15*3.75	1					+
14	15.8.04		20.12.04	יוני05			+		11.5*3.75 11.5*3.75 13*3.75 13*3.75	4					+
15	15.8.04		20.12.04	יוני05			+		11.5*3.75 11.5*3.75 13*3.75 13*3.75	4					+
16	15.8.04		20.12.04	יוני05			+		11.5*3.75 11.5*3.75 13*3.75 13*3.75	4					+
17	15.8.04		20.12.04	יוני05			+		11.5*3.75 11.5*3.75 13*3.75 13*3.75	4					+
22	22.8.04		20.12.04	יוני05			+		15*3.75	1					+
22	22.8.04		20.12.04	יוני05			+		13*3.75	1					+
15	-		20.12.04	יוני05			+		13*3.75	1				+
45	-		20.12.04	אפריל05			+		10*3.75	1				+
22	4.4.04		20.12.04	יוני05		+			13*3.25	1				+
36	12.10.04		20.12.04	אפריל05			+		13*3.75 13*3.75 11.5*3.75	3				+
37	12.10.04		20.12.04	אפריל05			+		13*3.75 13*3.75 11.5*3.75	3				+
38	12.10.04		20.12.04	אפריל05			+		13*3.75 13*3.75 11.5*3.75	3				+
11	25.7.04		20.12.04	יוני05			+		13*3.75	1				+
36	14.11.04		20.12.04	אפריל05			+		10*3.75 10*3.75	2					+
37	14.11.04		20.12.04	אפריל05			+		10*3.75 10*3.75	2					+
15	9.2.04	20.12.04	20.12.04	ספטמבר05			+		13*3.75	1					+
42	22.8.04		20.12.04	אפריל05		+			13*3.25 13*3.25	2					+
43	22.8.04		20.12.04	אפריל05		+			13*3.25 13*3.25	2					+
35	22.8.04		20.12.04	אפריל05			+		11.5*3.75	1					+
14	22.8.04		20.12.04	יוני05			+		13*3.75	1					+
36	26.9.04		21.12.04	אפריל05			+		13*3.75 13*3.75 10*3.75	3				+
37	26.9.04		21.12.04	אפריל05			+		13*3.75 13*3.75 10*3.75	3				+
14	18.7.04		21.12.04	יוני05			+		13*3.75 13*3.75 13*3.75	3				+
15	18.7.04		21.12.04	יוני05			+		13*3.75 13*3.75 13*3.75	3				+
16	18.7.04		21.12.04	יוני05			+		13*3.75 13*3.75 13*3.75	3				+
46	8.12.04		21.12.04	אפריל05			+		13*5.0	1				+
14	15.8.04		22.12.04	יוני05			+		13*3.75	1				+
35	26.12.04		27.12.04	אפריל05			+		13*3.75 13*3.75 10*3.75	3				+
36	26.12.04		27.12.04	אפריל05			+		13*3.75 13*3.75 10*3.75	3				+
37	26.12.04		27.12.04	אפריל05			+		13*3.75 13*3.75 10*3.75	3				+
44	29.8.04		27.12.04	אפריל05			+		11.5*3.75 13*3.75	2					+
46	29.8.04		27.12.04	אפריל05			+		11.5*3.75 13*3.75	2					+
33	15.8.04		27.12.04	אפריל05			+		13*5.0	1					+
35	15.8.04		27.12.04	אפריל05			+		10*3.75 11.5*3.75 11.5*3.75	3					+
36	15.8.04		27.12.04	אפריל05			+		10*3.75 11.5*3.75 11.5*3.75	3					+
37	15.8.04		27.12.04	אפריל05			+		10*3.75 11.5*3.75 11.5*3.75	3					+
34	22.8.04		27.12.04	אפריל05		+			13*3.25 13*3.25 11.5*3.25	3					+
45	22.8.04		27.12.04	אפריל05		+			13*3.25 13*3.25 11.5*3.25	3					+
46	22.8.04		27.12.04	אפריל05		+			13*3.25 13*3.25 11.5*3.25	3					+
21	22.8.04	27.12.04	27.12.04	ספטמבר05		+			15*3.25 15*3.25	2					+
22	22.8.04	27.12.04	27.12.04	ספטמבר05		+			15*3.25 15*3.25	2					+
12	31.10.04	27.12.04	27.12.04	ספטמבר05			+		15*3.75	1					+
45	-		27.12.04	אפריל05		+			13*4.0	1					+
45	21.12.04		28.12.04	אפריל05			+		13*3.75 13*3.75 13*3.75 13*3.75	4				+
46	21.12.04		28.12.04	אפריל05			+		13*3.75 13*3.75 13*3.75 13*3.75	4				+
47	21.12.04		28.12.04	אפריל05			+		13*3.75 13*3.75 13*3.75 13*3.75	4				+
24	16.11.04		28.12.04	יוני05			+		13*3.75	1				+
35	25.10.04		28.12.04	אפריל05			+		13*3.75	1				+
24	7.12.04		28.12.04	יוני05			+		13*3.75	1				+
15	18.7.04		29.12.04	יוני05			+		13*5.0	1				+
45	18.11.04		29.12.04	אפריל05			+		13*3.75 13*3.75	2				+
46	18.11.04		29.12.04	אפריל05			+		13*3.75 13*3.75	2				+
